1 **Touch inhibits touch: sanshool-induced paradoxical tingling reveals**  
2 **perceptual interference between somatosensory submodalities**

3 Antonio Cataldo<sup>†a b c</sup>, Nobuhiro Hagura<sup>†d e</sup>, Yousef Hyder<sup>a d</sup> & Patrick Haggard \*<sup>a b</sup>

4 *a. Institute of Cognitive Neuroscience, University College London, Alexandra House 17*  
5 *Queen Square, London, WC1N 3AZ, UK*

6 *b. Institute of Philosophy, School of Advanced Study – University of London, Senate House,*  
7 *Malet Street, London, WC1E 7HU, UK*

8 *c. Cognition, Values and Behaviour, Ludwig Maximilian University, Gabelsbergerstraße 62,*  
9 *80333 München, Germany*

10 *d. Center for Information and Neural Networks, National Institute of Information and*  
11 *Communications Technology, 1-4 Yamadaoka, Suita City, Osaka, 565-0871, Japan*

12 *e. Graduate School of Frontier Biosciences, Osaka University, Osaka, Japan*

13 <sup>†</sup> Equal contribution

14

15 \* ***Corresponding author:***

16 Prof. Patrick Haggard

17 Institute of Cognitive Neuroscience, University College London

18 Address: Alexandra House, 17 Queen Square, London, WC1N 3AZ

19 Email: [p.haggard@ucl.ac.uk](mailto:p.haggard@ucl.ac.uk)

20 Tel: +44 (0) 207 679 1153

21

22 **Abstract**

23 Human perception of touch is mediated by inputs from multiple channels. Classical theories  
24 postulate independent contributions of each channel to each tactile feature, with little or no  
25 interaction between channels. In contrast to this view, we show that inputs from two sub-  
26 modalities of mechanical input channels interact to determine tactile perception. The flutter-  
27 range vibration channel was activated anomalously using *hydroxy- $\alpha$ -sanshool*, a bioactive  
28 compound of Szechuan pepper, which chemically induces tingling sensations. We tested  
29 whether this tingling sensation on the lips was modulated by sustained mechanical pressure.  
30 Across four experiments, we show that sustained touch inhibits sanshool tingling sensations  
31 in a location-specific, pressure-level and time-dependent manner. Additional experiments  
32 ruled out mediation of nociceptive or affective (C-tactile) channels underlying this  
33 interaction. These results reveal novel inhibitory influence from steady-pressure onto flutter-  
34 range tactile perceptual channels, consistent with early-stage interactions between  
35 mechanoreceptor inputs within the somatosensory pathway.

36

37 **Keywords:**

38 Mechanoreceptor channel, SA mechanoreceptors, RA mechanoreceptors, Szechuan pepper,  
39 hydroxy- $\alpha$ -Sanshool, tactile perception.

40 **Introduction**

41 The sense of touch involves neural processing of multiple features of cutaneous stimuli.  
42 Features extracted from stimuli to the skin are conveyed to the brain through distinct classes  
43 of afferent fibre [1,2]. Some fibres are tuned for specific spatiotemporal skin deformation  
44 patterns, and are considered mechanoreceptor channels, while others are tuned for thermal  
45 and noxious features [3,4]. These neurophysiological channels can also be studied  
46 psychophysically, because different qualities of sensation (flutter, high-frequency vibration,  
47 steady pressure, etc) are thought to be conveyed by each afferent class [1,2,5].

48         Although the characteristics of each perceptual channel have been explored, little is  
49 known about how the information from each channel interacts to provide an overall sense of  
50 touch. For example, inhibitory interaction between mechanical and pain/thermal channels has  
51 been well established [6,7], but it is still unclear whether similar inhibitory interactions occur  
52 between the different mechanoreceptor channels or ‘submodalities’. Classical accounts  
53 assume that each mechanoreceptor channel (RA, SA1, PC, SA2) carries *independent*  
54 information about specific tactile features [8,9], and that this independence is preserved in  
55 early cortical somatosensory processing [10–13]. The independence hypothesis has been  
56 recently challenged by neurophysiological studies of responses in single neurons. These  
57 studies suggested interaction between signals from different mechanoreceptor channels at  
58 spinal, thalamic and cortical levels [2,14,15]. However, to our knowledge, few  
59 psychophysical studies have investigated the implications of inter-channel interaction for  
60 perception, as opposed to neural coding.

61         Here, we show the first *human psychophysical* evidence that signals from different  
62 mechanical feature channels do indeed interact to determine tactile perception. Specifically,  
63 we show that perception of flutter-range mechanical vibration (mediated by a perceptual  
64 channel putatively corresponding to a rapidly adapting [RA] neurophysiological channel) is

65 inhibited by concurrent activation of the perceptual channel for steady pressure (putatively  
66 corresponding to a slowly adapting [SA] channel). Thus, “touch inhibits touch”, in a manner  
67 similar to the established inhibitory interaction between mechanoreceptive and nociceptive  
68 channels (i.e. “touch inhibits pain”) [6,7].

69 Testing for interaction between perceptual channels might logically involve  
70 psychophysical tests of frequency-specific stimuli both alone, and in combination. However,  
71 delivering pure frequency-resolved stimuli to mechanoreceptors is difficult, because of the  
72 complex propagation of mechanical stimuli through the skin [16]. Here, we take an  
73 alternative approach that avoids the difficulties of delivering multi-channel mechanical  
74 stimuli, by *chemically* activating one target tactile feature channel, and then measuring the  
75 resulting percept in the presence or absence of additional mechanical stimulation to a second  
76 channel. In particular, we activated the perceptual flutter-range vibration channel  
77 (corresponding to a putative RA channel) using *hydroxyl-a-sanshool*, a bioactive compound  
78 of Szechuan pepper (hereafter sanshool), that produces localized tingling sensations with  
79 distinctive tactile qualities. Others have previously demonstrated that sanshool activates the  
80 light touch RA fibres [17–20], and we have previously shown that indeed, the perceptual  
81 flutter range tactile feature channel is activated by sanshool [21,22]. Here, we report the  
82 perceptual effects of first inducing sanshool-induced tingling, and then additionally applying  
83 controlled sustained pressure (corresponding to the putative SA channel input) to the same  
84 skin region. We used psychophysical methods to investigate how the intensity of sanshool-  
85 induced tingling sensations was modulated by the additional steady pressure input. This  
86 allowed us to assess the interaction between the two perceptual channels that are responsible  
87 for tactile steady pressure and tactile flutter features.

## 88 **Materials & Methods**

### 89 ***Participants***

90 A total of 55 right-handed participants (age range: 18-38 years) volunteered in Experiments  
91 1-5 (Experiment 1: 10 (two females), Experiment 2: 10 (5 females), Experiment 3: 9 (6  
92 females), Experiment 4: 18 (13 females), Experiment 5: 8 (7 females). Fifty-one new  
93 participants (31 females) took part in Experiment 6, which was conducted in the context of a  
94 science and culture fair. All participants were naive regarding the experimental purpose and  
95 gave informed written consent. Experiments 1-5 were approved by University College  
96 London Research Ethics Committee. Experiment 6 was approved by the Research Ethics  
97 Committee of the School of Advanced Study, University of London. See Supplementary  
98 Material for the inclusion criteria of each experiment.

99

### 100 ***Experiment 1***

101 In Experiment 1 ( $n = 10$ ), we tested whether the tingling sensation induced by sanshool  
102 (putative RA channel activation [17–23]) is modulated by application of sustained light  
103 pressure (putative SA channel activation [1,2,24]).

104 Tingling sensation was induced on the upper and lower lip vermilions by applying  
105 *hydroxyl-alpha-sanshool* (ZANTHALENE, 20% solution, Indena SPA., Milan, Italy) using a  
106 cotton swab (Figure 1A). This stimulation site was chosen because of its dense innervation of  
107 mechanoreceptors [25] and thin epidermis [26], which allows the chemical to reach the  
108 receptor effectively [21]. Participants sat on a chair, maintaining the upper and lower lip apart  
109 by biting a small section of straw between their canine teeth. Each trial started with a baseline  
110 period in which participants experienced the tingling sensation of sanshool all over the lips.  
111 Then, one of eight locations on the lips were manually stimulated by the experimenter with a  
112 probe (diameter: 14 mm, force: ~1.5 N) for 10 seconds. Touched locations included three

113 positions each on the upper and lower lip vermilion and two positions above and below the  
114 vermilion border respectively (Figure 1A). Participants were instructed to always attend to  
115 the medial part of the lower lip (position 6 in Figure 1A), and to judge the intensity of  
116 tingling in this specific target location, while the sustained pressure probe contacted one of  
117 the eight locations on the lips. Thus, in the baseline condition before the application of the  
118 pressure probe, participants experienced the sanshool tingling sensation and were asked to  
119 memorise this baseline intensity. Next, the experimenter applied the mechanical stimulus  
120 probe, and the participants again rated the tingling sensation that they experienced, relative to  
121 the previous baseline, while the contact with the mechanical probe remained in steady contact  
122 with the skin. A rating of 10 indicated that the perceived tingling was at the same level as the  
123 intensity at baseline; a rating of 0 meant that the participant did not perceive any tingling  
124 sensation at all; ratings above 10 would indicate a higher tingling intensity than the baseline  
125 period. The rating was given 10 s after the mechanical probe had been applied, to minimise  
126 any transient mechanical effects. An inter-trial interval of a few seconds without mechanical  
127 stimulation was always included, to allow the tingling sensation to return. Return of the tingle  
128 was asked after every trial, and the next trial started only when this was confirmed by the  
129 participant. The experiment consisted of six blocks. Each block, consisted of 10 trials; 2 trials  
130 each on positions 3 and 6, and one for the remaining six positions (positions 1, 2, 4, 5, 7, 8).  
131 This was done to increase sensitivity for the conditions we thought more relevant to the  
132 interaction hypothesis. The order of locations for mechanical stimulation was randomised  
133 within each participant.

134

## 135 ***Experiment 2***

136 Experiment 2 aimed to replicate and generalise the results of Experiment 1. The procedure  
137 was largely similar to Experiment 1. To make sure that the effect obtained in Experiment 1

138 was not due to sustained spatial attention to a single target location, participants experienced  
139 sanshool tingling all over the lips, and sustained pressure was applied to one of four  
140 quadrants (Figure 1B) randomly chosen on each trial. This time, instead of only rating the  
141 sanshool tingling at a single, fixed location, participants gave separate ratings of tingling  
142 intensity for all four lip quadrants, with the order of prompting being randomised.  
143 Participants completed six blocks. In each block, sustained touch was applied once to each  
144 location (16 ratings).

145

### 146 *Experiment 3*

147 Experiment 3 investigated whether sanshool tingling is modulated by different contact force  
148 levels. Given that SA receptor firing is proportional to contact force, [1,2,24], any neural  
149 interaction between the putative SA channel and sanshool-evoked tingling (putative RA  
150 channel) sensation should produce attenuation of sanshool tingling proportional to contact  
151 force. We tested this hypothesis with a novel psychophysical method involving comparing the  
152 intensity of two tingle sensations.

153 First, we arranged a situation where tingling intensity was higher for the lower lip  
154 than the upper lip, by applying 80% and 20% concentration sanshool solutions to the lower  
155 and upper lip respectively (Figure 1C). Participants rested on a chinrest with their lips kept  
156 apart (Figure 2). Prior to the main experiment, we confirmed that the stronger solution level  
157 of sanshool (lower lip) induced stronger intensity of tingling sensation compared to the weak  
158 solution (upper lip) (Supplementary Figure S2). Next, the medial part of the lower lip, which  
159 experienced the stronger tingling sensation, was stimulated with different contact forces  
160 (0.05, 0.1625, 0.275, 0.375, and 0.5 N). Forces were applied by a closed-loop system  
161 comprising a linear actuator (ZABER, XYZ Series, Vancouver, Canada) and a force gauge

162 (Mecmesin, PFI-200N GEB, Slinfold, UK) (Figure 2), which continuously maintained the  
163 desired pressure level. A cotton bud (diameter 4.5 mm) was placed between the force sensor  
164 and the lip. Participants performed a two-alternative forced choice comparison task to  
165 indicate whether the upper or the lower lip experienced the more intense tingling sensation.  
166 In each trial, one of five different levels of force were applied to the lower lip. One second  
167 after the onset of steady pressure, an auditory tone signalled that participants should judge  
168 whether the lower or the upper lip currently had the higher intensity of tingling sensation.  
169 Participants performed three blocks, each consisting of ten repetitions of the five contact  
170 forces, in random order, giving 150 trials in total.

171

#### 172 ***Experiment 4***

173 Experiment 4 tested how tingle intensity varied according to the time course of a sustained  
174 pressure stimulus. The discharge rate of SA neurons in response to static touch decreases  
175 gradually over time, dropping to 30% of the initial firing after 10 seconds [24]. Therefore, if  
176 the activation of the pressure (SA) channel drives suppression of the tingling sensation, some  
177 time-dependent recovery of tingling sensation should occur.

178         The setup was similar to Experiment 3 (Figure 1D). However, sanshool (80% solution)  
179 was applied on the lower lip only, while the upper lip rested on the probe of a vibro-tactile  
180 shaker (BRÜEL & KJÆR, LDS V101, Nærum, Denmark) (Figure 2). In each trial,  
181 participants first estimated the intensity of sanshool tingling on the lower lip by adjusting the  
182 amplitude of 50 Hz vibration [21] applied to the upper lip until the two intensities felt similar.  
183 Amplitude adjustments were made by the participant using the volume setting of an  
184 electronic amplifier. The point of perceptual equivalence between mechanical vibration and  
185 sanshool-evoked tingle was indicated by pressing a key. Next, one of three different force



186 levels (0.05, 0.20 or 0.35 N) was applied to the lower lip (Figure 1D). An auditory signal was  
187 delivered when the closed-loop system had achieved a steady force at the target level.  
188 Participants were instructed to note the intensity of the tingling sensation on the lower lip at  
189 the time of the beep, and to adjust the amplitude of mechanical vibration to the upper lip until  
190 it had a perceptually equivalent intensity. They were instructed to make the adjustment as  
191 accurately as possible, while taking no longer than 5 s. Their mean reaction time was 2.30 s  
192 (SD 0.62 s). Two further beeps sounded 5 and 10 s after the initial application of sustained  
193 force contact, requiring two further matching attempts. Thus, four successive estimations  
194 were collected in each trial, one before and three after the pressure application. For a video of  
195 the setup and an example trial of Experiment 4, see Supplementary Video S1 at  
196 <https://tinyurl.com/yyuoecqd>. The experiment consisted of three blocks, with each block  
197 consisting of ten repetitions of the three force levels (30 trials in total). The order of the  
198 forces was randomised within each participant.

199

## 200 *Experiment 5*

201 Experiment 5 investigated whether sanshool-induced tingling might reflect the activity of the  
202 nociceptive channels induced by the activation of nociceptive small-diameter C-fibres.  
203 Animal studies show that sanshool activates both large-diameter myelinated ( $A\beta$ ) neurons, as  
204 well as small-diameter unmyelinated C-fibres [17,19,20]. Although nociceptive  $A\beta$  neurons  
205 have also been recently described in humans [27], it is not clear whether these fibres are also  
206 activated by sanshool. We reasoned that attenuation of sanshool tingling by steady pressure  
207 could only be considered a touch-touch interaction if the tingling sensation could be  
208 attributed to a perceptual channel for touch, rather than a nociceptive channel. Therefore, to  
209 rule out the contribution of nociceptive C-fibres to sanshool tingling, we measured both pain  
210 thresholds and perceived intensity of tingling before and after blocking the activity of small

211 fibres through lidocaine [28,29]. If the tingling is unrelated to the C-fibre activation, the  
212 sensitivity to pain would be affected by lidocaine, but the intensity of the tingling sensation  
213 would not.

214 Sanshool (20% solution) was applied on the lower lip. Pain thresholds for electro-  
215 tactile stimuli delivered on the lips were obtained using 4 mm diameter concentric bipolar  
216 electrode connected to a constant current stimulator (Digitimer, Ltd., DS7, Welwyn Garden  
217 City, United Kingdom) (Figure 1E). This type of electrode is known to preferentially activate  
218 nociceptive fibres at low intensities [30]. Small diameter C-fibres were blocked through a  
219 0.9% w/w lidocaine hydrochloride solution (Boots UK Ltd, ANBESOL liquid, Nottingham,  
220 United Kingdom), a non-prescription topical anaesthetic widely used for relief of orofacial  
221 pain. Lidocaine is thought to affect predominantly Nav1.7 channels [29] and to preferentially  
222 block nociceptive fibres [28]. While lidocaine also blocks large fibres [28,31], its anaesthetic  
223 effects on different submodalities display a distinct temporal gradient [31]. In particular,  
224 pinprick and thermal sensations that characterise nociceptive and thermoceptive activities are  
225 impaired within 10 minutes of application. Conversely, tactile, proprioceptive, and motor  
226 sensations associated with larger fibres activity are affected only after longer intervals after  
227 administration (~15 minutes) [31]. Thus, to ensure an effective block of smaller fibres only,  
228 tests were performed within 10 minutes of lidocaine application.

229 In a 2 (time: pre-block, post-block) x 2 (sensation judged: tingling, pain) within-  
230 subject design, pain thresholds and tingling intensity ratings were measured before and after  
231 administration of lidocaine. Participants performed two sessions. In session A, participants  
232 rated the intensity of sanshool tingling on the lower lip (from 0: “no tingling at all”, to 10:  
233 “the strongest tingling sensation imaginable”). Session B took place at least one hour after  
234 session A, when participants confirmed that the tingling sensation had completely  
235 disappeared [32]. First, participants’ pain thresholds were estimated using a staircase

236 procedure [33] (see Supplementary Material for details), then lidocaine was applied on a 2 x  
237 1 cm area in the centre of the lower lip. Pain thresholds were estimated again after three  
238 minutes. Immediately after the second pain threshold estimate, the same area of the lip was  
239 painted with sanshool, and participants rated the intensity of tingling, using the same scale  
240 used in session A.

241

## 242 ***Experiment 6***

243 Experiment 6 investigated whether sanshool tingle might reflect activation of C-tactile  
244 afferents. Small-diameter C-fibres responsive to tactile, but not to nociceptive stimuli have  
245 been characterised in detail by many animal [3,34] and human studies [35,36]. Although C-  
246 tactile fibres are commonly found in hairy, but not glabrous skin [36], there is  
247 electrophysiological evidence of the existence of C low-threshold mechanoreceptors in the  
248 glabrous skin of rat hind paw [37], and psychophysical evidence, using nerve blocks, of a C  
249 low-threshold input from the glabrous skin of human hand [38,39]. While we are not aware  
250 of reports of C-tactile fibres innervating the skin of the lips, this may simply reflect previous  
251 sampling, and the possibility cannot be excluded. C-tactile fibres generally respond  
252 preferentially to tactile stimuli moving at intermediate velocities [35,36]. Tactile motion  
253 tuning cannot readily be assessed with a chemical stimulus like sanshool. Importantly,  
254 however, C-tactile fibres also show preference for neutral, skin temperature (32 °C) stimuli,  
255 rather than warm (40 °C) or cold (18 °C) stimuli [35]. Thus, if the sanshool tingle is mediated  
256 by a C-tactile channel, the perceived intensity of sanshool tingling should be maximal at  
257 neutral temperatures and reduced during cold or warm thermal stimulation, producing an  
258 inverted U-shape.

259           The perceived intensity of sanshool-induced tingling on the lower lip (20% solution)  
260 was assessed during three different thermo-tactile conditions: cold (21 °C), neutral (33 °C),  
261 and warm touch (41 °C) (Figure 1F). As a baseline condition, tingling intensity without any  
262 stimulation was also measured using the same scale used in Experiment 5. Thermo-tactile  
263 stimuli were delivered using a 13 mm diameter Peltier thermode (Physitemp Instruments Inc,  
264 NTE-2A, New Jersey, USA). Each trial started with a 10 s countdown to allow the thermode  
265 to reach the intended temperature. Then participants applied their lower lip against the  
266 thermode probe. Participants were asked to move their head to approach the probe of the  
267 Peltier device in each trial until their lower lip contacted it, and then maintain a posture that  
268 applied gentle touch for 4 s. The experimenter monitored that attendees kept their lip in stable  
269 contact with the stimulator for the entire duration of the stimulation. Four seconds after the  
270 initial contact, participants were prompted to rate the intensity of the tingle. After the rating,  
271 participants withdrew their lip from the thermode. Each thermo-tactile condition was repeated  
272 four times (12 trials in total). The order of thermal conditions was randomised across  
273 participants.

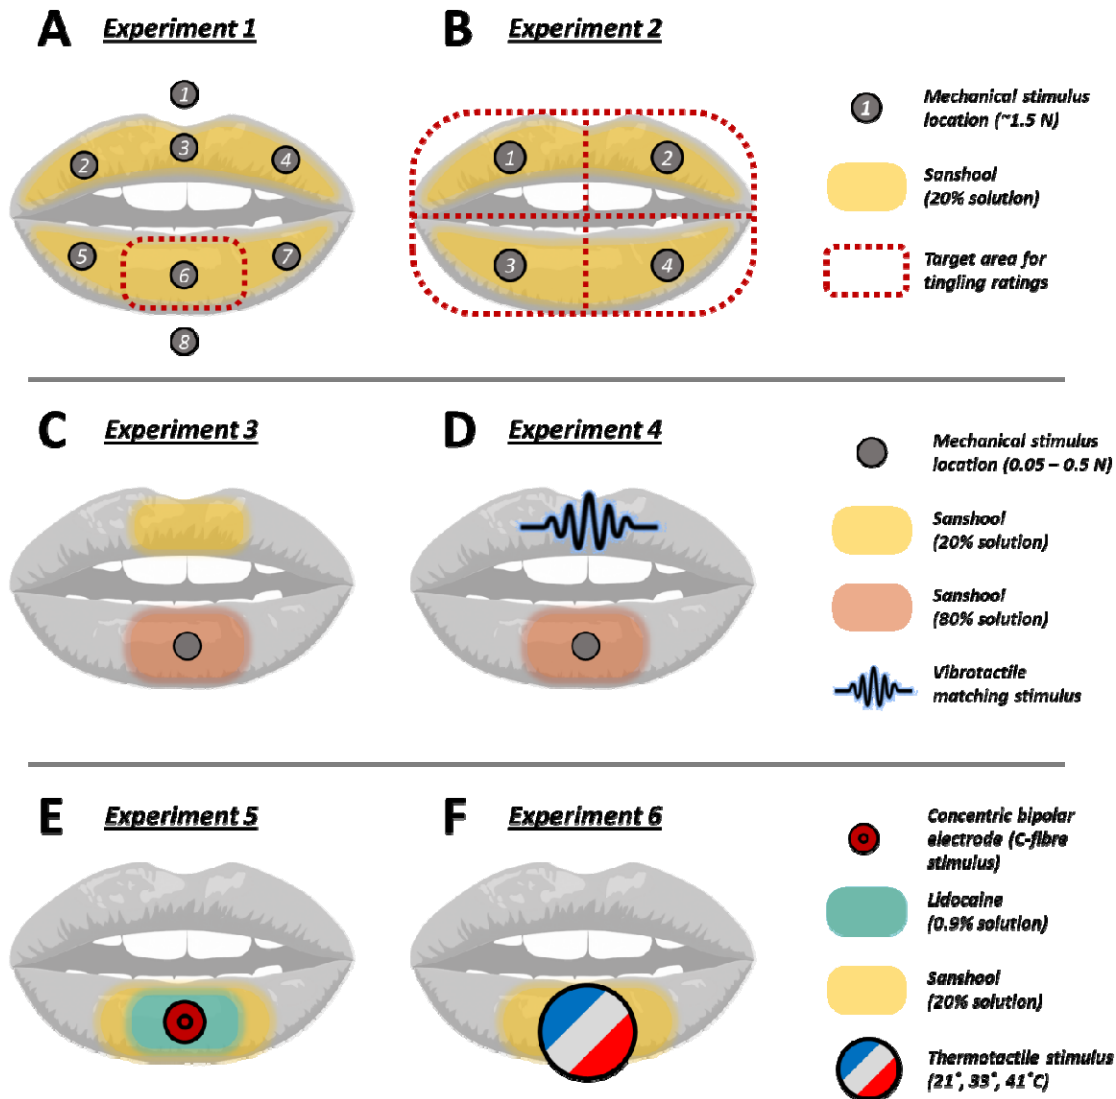

274

275 **Figure 1. Experimental methods. A-B:** In Experiments 1 and 2, participants (n = 10 in each  
276 experiment) experienced sanshool tingling all over the lips, while sustained touch (~1.5 N)  
277 was manually applied in different locations for 10 s. Participants reported the effect of touch  
278 location on sanshool tingling by rating the change in tingling intensity on the centre of the  
279 lower lip (**A:** Experiment 1) or all over the lips (**B:** Experiment 2). **C:** In Experiments 3,  
280 weaker and stronger sanshool solutions caused weaker and stronger tingling intensities on the  
281 upper and lower lips, respectively. Different levels of sustained force (0.05, 0.1625, 0.275,  
282 0.375, and 0.5 N) were then applied to the lower lip by a closed-loop robotic device (see

283 Figure 2). Participants (n = 8) reported which lip had the strongest tingling, as a function of  
284 sustained force. **D:** In Experiment 4, participants (n = 14) estimated the intensity of sanshool  
285 tingling on the lower lip by adjusting the amplitude of 50 Hz vibration applied to the upper  
286 lip until the intensities felt equal. Meanwhile, different levels of sustained force (0.05, 0.20 or  
287 0.35 N) were applied on the lower lip. The adjustment was done at four different timings  
288 from the onset of the force (before pressure, and at 0, 5, and 10 s after pressure) (see  
289 Supplementary Video S1 at <https://tinyurl.com/yyuoecqd> for an example of a trial). **E:** In  
290 Experiment 5, the pain thresholds and tingling ratings of eight participants were measured  
291 during sanshool stimulation, both before and after topical application of Lidocaine  
292 (0.9%w/w). **F:** In Experiment 6, participants (n = 51) rated the intensity of sanshool tingling  
293 (20%) during three levels of thermotactile stimulation (21, 33, and 41° C).

294

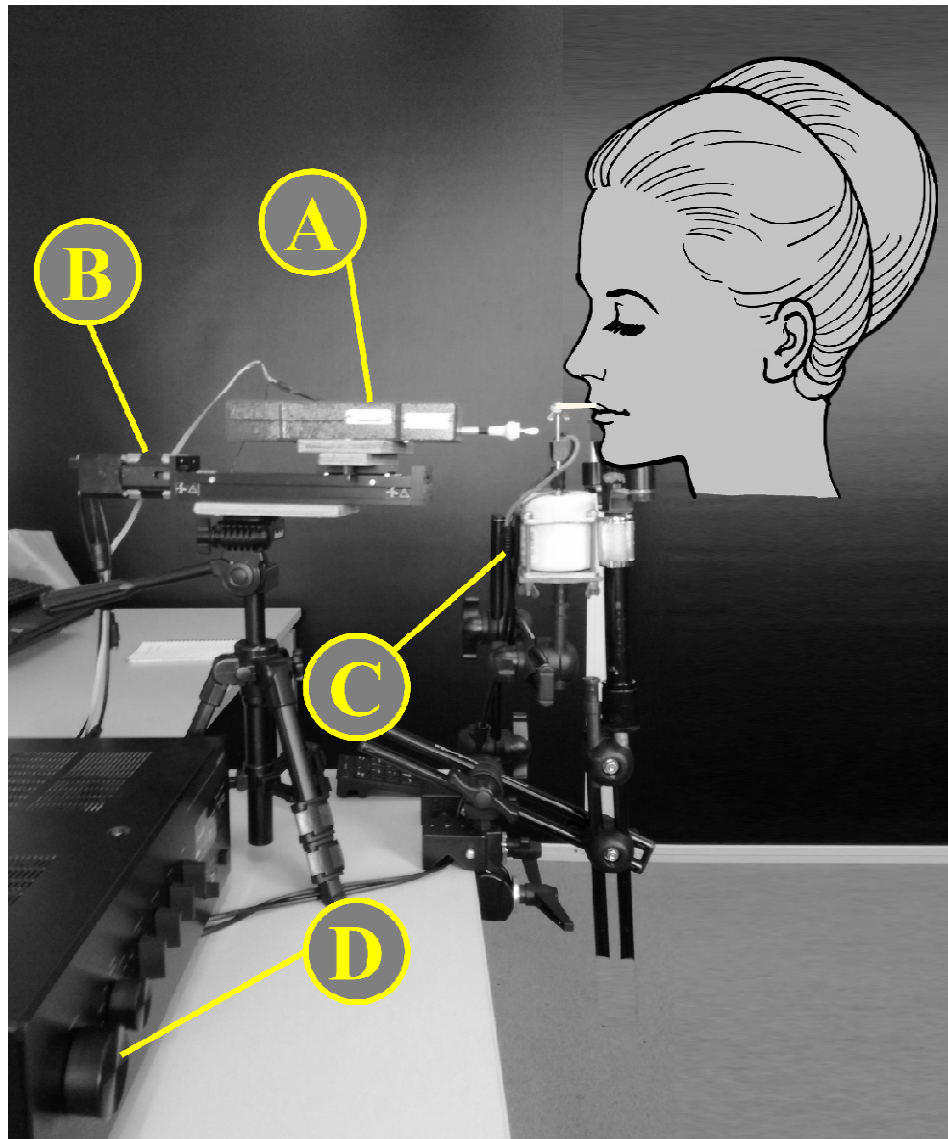

295

296 **Figure 2. Experimental setup.** In Experiments 3 and 4, sustained touch was applied to the  
297 lower lip by a mechanical probe, which exerted a target level of contact force via a motor (**B**)  
298 controlled in a closed-loop arrangement using a strain-gauge force sensor (**A**). In Experiment  
299 4, 50 Hz mechanical vibration was applied to the upper lip by a vibrator (**C**). Participants  
300 could adjust the vibration amplitude using the gain knob of an amplifier (**D**). See  
301 Supplementary Video S1 at <https://tinyurl.com/yyuoecqd> for a video of the setup and an  
302 example trial of Experiment 4.

303

304 **Results**

305 *Experiment 1: Sustained light-touch (putative SA input) inhibits Sanshool-induced*  
306 *tingling (putative RA input)*

307 When the probe was applied at the judged target position (always the centre of the lower lip),  
308 tingling intensity was dramatically reduced (to a mean  $24.7\% \pm \text{SD } 34.0$  of the perceived  
309 intensity at baseline before the probe was applied) (Figure 3A). A one-sample t-test was used  
310 to compare the perceived intensity of tingle when the probe was present, to the null mean  
311 value of 10 which was defined in our rating scale as the perceived intensity at baseline). The  
312 result showed a significant reduction ( $t(9) = 7.00, p < 0.001, dz = 2.21$ . All p-values are  
313 Bonferroni-corrected for 8 positions).

314 The tingling sensation at the target position was not affected by pressure on the upper  
315 lip or off the lips (all  $p > 0.25$ , Bonferroni corrected). However, a significant reduction in  
316 tingling intensity relative to baseline was found when pressure was applied to the two lower  
317 lip locations adjacent to the judged target location (left side:  $t(9) = 4.28, p = 0.016$  Bonferroni  
318 corrected,  $dz = 1.35$ ; right side:  $t(9) = 4.25, p = 0.017$  Bonferroni corrected,  $dz = 1.34$ ). A  
319 repeated measures ANOVA showed a clear spatial gradient on the lower, but not the upper lip  
320 (see Supplementary Material).

321 Thus, sustained touch produced a robust inhibition of tingling sensation at the location  
322 where the tingling intensity was judged and at adjacent locations.

323

324 *Experiment 2: Inhibition of sanshool tingling sensation is spatially graded*

325 For the quadrant where sustained touch was applied, we replicated the results of Experiment  
326 1, finding robust reduction of tingling under pressure relative to the baseline (mean rating;  
327  $28.3\% \pm \text{SD } 36.8$  of the baseline intensity) (see Supplementary Figure S1). We re-aligned the  
328 rating data of each remaining quadrant relative to the quadrant where the sustained touch was



329 applied (Figure 3B). We could thus compare the effect on tingling of delivering sustained  
330 touch to either the same lip as the location where the tingling rating was judged, or the other  
331 lip, and likewise for sustained touch on the same side of the midline as the rated location, or  
332 the opposite side. The realigned data showed significant reduction of the tingling rating from  
333 the baseline at the quadrant where the sustained touch was applied ( $t(9) = 6.17, p < 0.001$   
334 Bonferroni corrected for four comparisons,  $d_z = 1.95$ ), and also at the other quadrant on the  
335 same lip ( $t(9) = 2.56, p = 0.045$  corrected,  $d_z = 1.00$ ) (Figure 3B).

336         Next, we directly compared the tingle ratings across different locations in respect to  
337 the probe (realigned data). A 2 (lip; same or different to the probe) x 2 (side; same or different  
338 to the probe) repeated measures ANOVA revealed significant main effect both for the factor  
339 of the lip ( $p = 0.003, \eta_p^2 = 0.655$ ) and the side of the probe ( $p < 0.001, \eta_p^2 = 0.842$ ), and also  
340 an interaction effect ( $p = 0.001, \eta_p^2 = 0.692$ ). In the planned comparisons, for the touched lip,  
341 the tingle ratings for the touched quadrant was significantly more inhibited compared to the  
342 untouched quadrant ( $t(9) = 6.30, p < 0.001, d_z = 1.99$ ). Interestingly, on the untouched lip  
343 also, the quadrant on the same side as the touch again had lower ratings than the other side  
344 ( $t(9) = 1.58, p = 0.025, d_z = 0.50$ ). This implies that the inhibition of the tingling depends on  
345 the spatial distance between the location where tingling is judged and the location of  
346 sustained touch, both within and across lips. Since the lips did not touch during the  
347 experiment (see Methods) this rules out mechanical propagation of sustained pressure as the  
348 cause of altered RA mechanoreceptor transduction. Instead, the interaction appears to occur at  
349 some neural processing level where afferents from the two mechanoreceptors are integrated  
350 in a spatially organised manner.

351

352 ***Experiment 3: Sanshool tingling is parametrically inhibited as a function of contact***  
353 ***force***

354 We first checked that sanshool concentration influenced tingling intensity. As expected,  
355 participants reported significantly higher intensity for the 80% concentration on the lower lip  
356 (average rating:  $6.6 \pm \text{SD } 1.55$ ) compared to the 20% concentration on the upper lip (average  
357 rating:  $3.2 \pm \text{SD } 1.06$ ) ( $t(7) = 6.94$ ,  $p < 0.001$ ,  $d_z = 2.45$ ) (Supplementary Figure S2).

358 The probability of participants reporting a stronger sensation on the lower lip reduced  
359 progressively, and approximately linearly, as the force on the lower lip increased ( $F(1.6, 11.2)$   
360  $= 12.09$ ;  $p = 0.002$ ;  $\eta_p^2 = 0.63$ ) (Figure 3D). The suppressive effect of pressure on tingling  
361 intensity was confirmed by linear trend analysis ( $F(1, 7) = 15.43$ ;  $p = 0.006$ ;  $\eta_p^2 = 0.69$ ). Thus,  
362 RA activation induced by sanshool is parametrically modulated by the signal strength of the  
363 SA input.

364

365 ***Experiment 4: Quantifying the relation between sustained force and sanshool-***  
366 ***tingling sensation across time***

367 After initial inspection of the data, we found that the distribution of the vibration amplitude  
368 matches deviated significantly from the normal distribution (see Supplementary Table S7).  
369 The statistical analysis was therefore conducted after log-transforming the data. However, to  
370 maintain the data in interpretable scale, we report and show the means and the standard errors  
371 in the original units ( $\mu\text{m}$ ). The initial perceived tingling on the lower lip without pressure was  
372 matched by, on average,  $13.9 \mu\text{m}$  ( $\pm \text{SD } 5.9$ ) peak-to-peak amplitude of a 50 Hz vibration on  
373 the upper lip. Sustained contact force of 0.05 N on the lower lip reduced the tingling to a  
374 level that was now matched by  $8.4 \mu\text{m}$  ( $\pm \text{SD } 4.6$ ) of vibration amplitude. Contact forces of  
375 0.20 N and 0.35 N were matched by  $8.2 \mu\text{m}$  ( $\pm \text{SD } 4.1$ ) and  $7.6 \mu\text{m}$  ( $\pm \text{SD } 3.4$ ) vibration

376 amplitudes respectively (Figure 3E). For each contact force level, the perceived intensity of  
377 tingling was significantly reduced at all time points (pressure onset, +5 s, and +10 s after  
378 pressure onset) compared to the initial baseline period without any pressure contact ( $p < 0.05$   
379 corrected for all 9 comparisons), replicating the result of Experiments 1-3.

380 We specifically wanted to investigate whether the reduction of tingling sensation  
381 would change with the force level applied, and whether that reduction would change as a  
382 function of time from onset of probe contact. A 3 (force: 0.05, 0.20, and 0.35 N) x 3 (time:  
383 force onset, +5 s, and +10 s after force onset) repeated measures ANOVA on the vibration  
384 amplitude showed significant main effect for both factors of contact force level ( $F(2,26) =$   
385  $4.32; p = 0.024; \eta_p^2 = 0.249$ ) and time since contact ( $F(2,26) = 4.92; p = 0.015; \eta_p^2 = 0.275$ ),  
386 but no significant interaction effect ( $F(4,52) = 0.27; p = 0.897$ ) (Figure 3E).

387 We used Fisher's LSD methods to identify conditions that differed significantly. For  
388 the force level factor, estimated tingling amplitude was significantly reduced in the highest  
389 (0.35 N) compared to the middle force level (0.20 N) ( $t(13) = 3.54, p = 0.004, dz = 0.94$ ).  
390 Comparison with the lowest force level (0.05 N) showed a similar trend ( $t(13) = 2.15, p =$   
391  $0.051, dz = 0.57$ ) (Figure 3E). Therefore, the intensity of tingling was suppressed in a force-  
392 dependent fashion, as expected from Experiment 3. We investigated the effect of time in the  
393 same way. The perceived tingle intensity recovered as time elapsed (onset vs. +5 s:  $t(13) =$   
394  $2.82, p = 0.014, dz = 0.75$ ; onset vs. +10 s:  $t(13) = 2.38, p = 0.033, dz = 0.63$ ) (Figure 3E).  
395 Since activity of SA neurons gradually reduces over time due to the adaptation to sustained  
396 pressure input [24], this modest time-dependent recovery of tingling sensation is consistent  
397 with the hypothesis that activity of SA neurons underlies suppression of RA mediated  
398 sanshool-tingling.

399

400 ***Experiment 5: Sanshool-evoked tingling is not mediated by small-diameter***  
401 ***unmyelinated C-nociceptive fibres***

402 Bayesian statistics [40,41] were used as the experiment was designed to test the null  
403 hypothesis (i.e., lidocaine does not reduce sanshool tingle). First, we ran a one-tailed  
404 Bayesian t-test to confirm that lidocaine effectively blocked small C-nociceptive fibres. As  
405 expected, participants' pain thresholds were significantly higher after lidocaine gel  
406 administration to the lips (mean 1.08 mA  $\pm$  SD 0.27), compared with pre-administration  
407 (mean 0.84 mA  $\pm$  SD 0.27) ( $BF_{10} = 18.26$ ; error %  $< 0.001$ ) (Figure 3F). We then tested our  
408 null hypothesis that lidocaine administration would not affect sanshool-induced tingling. As  
409 the alternative hypothesis (i.e. lidocaine reduces tingling) was unidirectional, a one-tailed test  
410 was used. The Bayesian analysis showed that the data were more likely under the null than  
411 under the alternative hypothesis ( $BF_{01} = 3.239$ ; error % = 0.009). Tingling ratings were  
412 statistically identical before (mean 5.78  $\pm$  SD 1.7 arbitrary units) and after (mean 5.81  $\pm$  SD  
413 1.5 arbitrary units) lidocaine administration (Figure 3G).

414 Thus, despite effective block of nociceptive afference by lidocaine, sanshool-evoked  
415 tingle remained unaltered, suggesting the small fibre C-nociceptors are not the main  
416 contributor on tingling sensation. Therefore, tactile gating of tingle presumably involves a  
417 different mechanism to the familiar "gate control" of pain by touch.

418

419 ***Experiment 6: Affective touch channel activation does not mediate sanshool-evoked***  
420 ***tingling***

421 First, we confirmed that sanshool tingling is suppressed by the sustained touch, as shown in  
422 Experiments 1-4. As expected, sustained touch at neutral temperature significantly decreased  
423 (53.8%) the sanshool tingling intensity (mean rating 2.81  $\pm$  SD 1.7) compared with no

424 mechanical touch (mean rating  $6.08 \pm \text{SD } 1.9$ ) ( $t(50) = 9.01$ ,  $p < 0.0001$ ,  $d_z = 1.26$ ). Next, we  
425 compared ratings of tingling intensity under different temperature conditions. Cold touch  
426 produced the lowest ratings ( $1.85 \pm \text{SD } 1.7$ ), and warm touch the highest ( $4.67 \pm \text{SD } 2.6$ )  
427 (Figure 3H). Therefore, the suppression effect decreased as the temperature of the stimulus  
428 increases. We accordingly found a significant main effect of temperature conditions in a one-  
429 way repeated measures ANOVA on participants' intensity ratings of tingling during the three  
430 thermo-tactile conditions ( $F(1.5, 77.2) = 43.34$ ;  $p < 0.0001$ ;  $\eta_p^2 = 0.464$ ). All pairwise  
431 comparisons were significant ( $p \leq 0.002$  in each case; Bonferroni-corrected). This  
432 suppression pattern clearly differs from the inverted U-shape that would be expected from C-  
433 tactile fibre thermal sensitivity. On the other hand, the linear relation to temperature is  
434 consistent with the known thermal modulation of SA fibres, which respond more at lower  
435 temperatures (see Discussion).

436

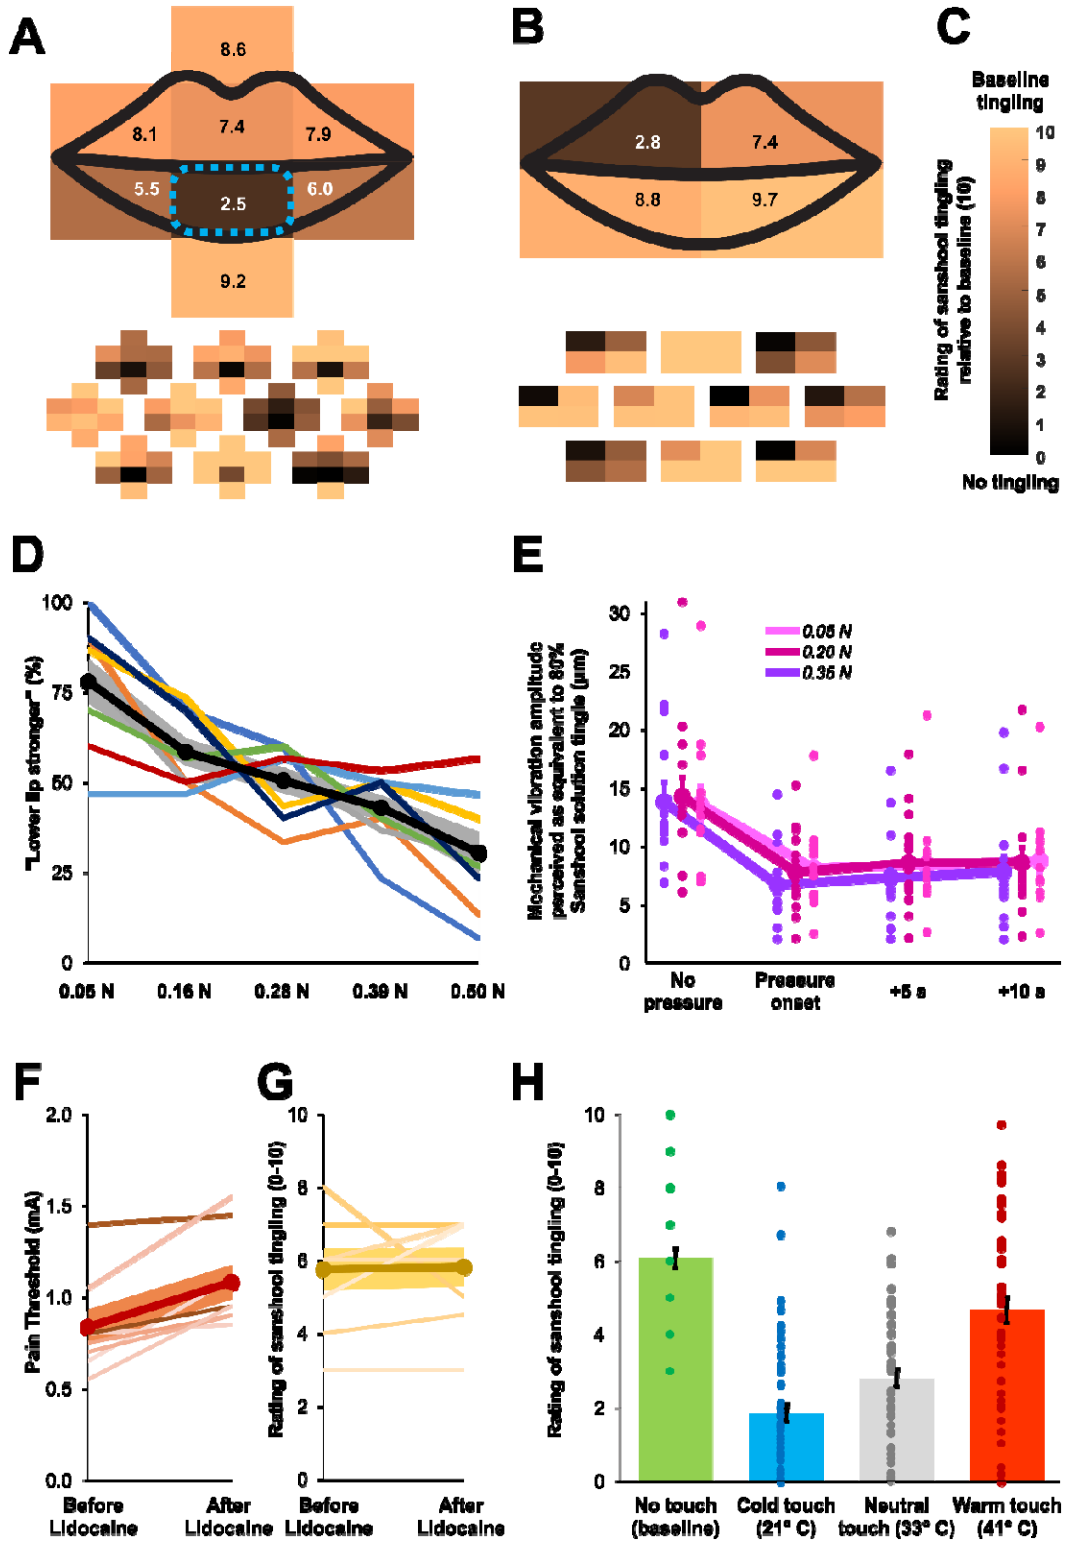

437

438

439 **Figure 3. Results. A-C:** Mean (top) and individual (bottom;  $n = 10$  in each experiment)  
440 perceived intensity of sanshool tingling as a function of touch location in Experiments 1 (**A**)  
441 and 2 (**B**). Colour indicates the perceived intensity relative to the baseline period (**C**) (darker  
442 colours indicate lower ratings). In Experiment 1 (**A**), the perceived intensity of sanshool  
443 tingling at the target location (centre of lower lip) dropped significantly when sites on the  
444 lower lip were touched by the probe. In Experiment 2 (**B**), touch was applied to each of four  
445 quadrants in random order. Each time touch was applied, participants gave separate tingling  
446 ratings for each quadrant, after being prompted in random order. Data from all four touch  
447 conditions were realigned to the left upper lip position to express the spatial relation between  
448 the location where tingling intensity was judged and the location where sustained touch was  
449 applied. Significant intensity reduction was observed at the location where the touch was  
450 applied. **D:** In Experiment 3 ( $n = 8$ ), the probability of judging the lower lip tingling intensity  
451 as stronger than the upper lip decreased as force level increased. The black line represents the  
452 sample average, the grey shading represents the SEM, and coloured lines represent individual  
453 data. **E:** In Experiment 4 ( $n = 14$ ), the estimated vibration amplitude of sanshool tingling  
454 decreased as a static force increased. Moreover, the intensity of tingling significantly  
455 recovered as time elapsed. Error bars indicate the SEM across participants and coloured dots  
456 indicate individual data. **F-G:** Pain thresholds and ratings of sanshool tingling intensity  
457 before and after administration of lidocaine in Experiment 5 ( $n = 8$ ). As expected, lidocaine  
458 induced a significant increase in participants' pain thresholds (**F**). In contrast, the perceived  
459 intensity of sanshool-induced tingling was not affected by lidocaine administration (**G**). Dark  
460 lines represent the sample average, shadings represent the SEM, and coloured lines represent  
461 individual data. **H:** Participants' ratings of sanshool-induced tingling during three thermo-  
462 tactile conditions in Experiment 6 ( $n = 51$ ). The tingling intensity was linearly modulated by

463 cold (21 °C), neutral (33 °C) and warm (41 °C) stimuli. Error bars indicate SEM across  
464 participants and coloured dots represent individual data.



465 **Discussion**

466 Somatosensory perception involves integration of multiple features that reach the brain  
467 through different afferent channels. A central question is therefore whether and how inputs  
468 from these different channels interact with each other [2,14,42]. Classical theory suggested  
469 that specific frequency-selective channels, associated with specific receptors and afferent  
470 fibre types, were processed independently at least until early sensory cortex [10]. While some  
471 neuronal studies have begun to challenge the classical view of independent frequency  
472 channels [2,14,15,43], our study constitutes the first *perceptual* evidence for interactions  
473 between somatosensory submodalities. Using a novel approach involving anomalous  
474 chemical stimulation of mechanoreceptor channels, we show strong inhibitory interactions  
475 between distinct perceptual channels encoding different preferred frequencies. Specifically,  
476 we show that the tingling sensation associated with the flutter-range vibratory channel  
477 (putative RA channel) is inhibited by the input of sustained pressure (putative SA channel).  
478 We further showed that this inhibitory interaction is spatially selective and proportional to the  
479 activation of the pressure channel.

480 In the current study, we investigated perceptual channels based on  
481 psychophysically-defined characteristics. These methods identify perceptual channels by  
482 threshold differences across different stimulus frequencies, and by observing perceptual  
483 modulations due to adaptation and masking [44]. Although the peripheral (receptor/afferent  
484 fibre) basis of tactile feature processing have been extensively studied by neurophysiologists,  
485 we still do not know the precise details of the mapping between channels defined by  
486 peripheral physiology, and the perceptual channels defined by psychophysics. Nevertheless,  
487 the principle of studying principles of CNS organisation based on psychophysically-defined  
488 perceptual channels has been well established, for example in the visual system [45]. By

489 analogy to visual psychophysics studies, we believe that the tactile feature processing system  
490 can also be usefully investigated by studying interaction between perceptual channels.

491 *Hydroxy- $\alpha$ -Sanshool* has been shown to activate the rapidly-adapting light-touch  
492 fibres in rats [17,20]. Using both adaptation [21] and masking paradigms [22], previous  
493 studies have demonstrated that a flutter-range vibration channel (putative RA channel)  
494 activation is responsible for the sanshool-induced tingling sensation. First, the perceived  
495 sanshool-induced tingling frequency on the lips is reduced by adapting the RA channel using  
496 prolonged mechanical vibration [21], paralleling the reduction in perceived frequency of  
497 mechanical vibration by similar adaptation procedures. Second, application of sanshool on  
498 the skin impairs detection of 30 Hz mechanical vibration (RA channel dominant frequency)  
499 but does not affect detection of 240 Hz (PC channel dominant frequency) or 1 Hz (SA  
500 channel dominant frequency) mechanical vibration [22], demonstrating that sanshool can  
501 selectively affect the putative RA channel. Finally, microstimulation studies confirm the  
502 strong link between RA activation and flutter-range vibration sensations [46]. Thus, although  
503 we could not directly measure RA afferent responses to sanshool, we may nevertheless study  
504 the perceptually-defined channel underlying the sanshool tingling sensation, while identifying  
505 this putatively as an RA channel. Future microneurographic studies could potentially provide  
506 stronger evidence about the physiological afferents responsive to sanshool, including  
507 selectivity for particular afferent types.

508 In the meantime, psychophysical techniques can go some way to investigating  
509 whether other non-mechanical, temperature/pain related channels might also contribute to  
510 sanshool tingling sensations. While animal studies have shown that sanshool activates small  
511 fibres [17,20] as well as RA fibres, our perceptual Experiments 5 and 6 suggested that C-  
512 nociceptive and C-tactile fibres did not contribute to the tingling sensation. First, perceived  
513 intensity of sanshool-evoked tingling was unaffected by topical lidocaine anaesthetics that

514 preferentially block small fibres [28,29]. Second, perceived intensity of the tingling sensation  
515 showed a linear and monotonic increase as a function of stimulation temperature, in clear  
516 contrast to the inverted-U shape that characterises thermal modulation of C-tactile firing [35].  
517 However the thermal sensitivity of C-tactile fibres remains controversial, since some studies  
518 found C-tactile responses to cooling of the skin [47,48], rather than the inverted-U shape  
519 [35]. However, our observation of enhancement of tingling by warmth is incompatible with  
520 both of these reported patterns of C-tactile thermal modulation, yet is compatible with the  
521 reported thermal modulation of RA firing [49,50]. Our perceptual findings also agree with  
522 evidence from microneurography [51] and clinical neuropathies [52,53], which both  
523 consistently identify tingling paraesthesia sensations with activation of large-diameter  
524 afferents. In contrast, activation of small-diameter afferents generally elicits low, dull, painful  
525 sensations.

526         We found that sustained light touch attenuated sanshool tingle, and we propose that  
527 this reflects an interaction between the corresponding perceptual channels. Our experimental  
528 design successfully controlled for several alternative possible explanations of touch-induced  
529 suppression of tingling. First, we ruled out the possibility that sustained touch may have  
530 attracted attention to mechanical stimulus, either distracting attention away from the tingling  
531 sensation, or masking sanshool-induced activity in the same channel [54,55]. Explanations  
532 based on distraction cannot readily explain why suppression of tingle was location-  
533 dependent, with stronger suppression of tingling at the location of touch compared to remote  
534 from it. Alternative explanations based on masking would require the steady pressure  
535 stimulus to activate the same perceptual channel as sanshool, i.e., the putative RA channel.  
536 RA afferents typically respond at the onset of a steady pressure, but lack a sustained response  
537 [5,56]. Intra-channel masking theories would therefore predict transient suppression of tingle  
538 sensation at the onset of steady pressure, with rapid rebound of tingle during continued tactile

539 contact. Yet, in Experiments 1, 2, and 4 we found significant touch-induced attenuation of  
540 sanshool tingle after 10 s of continuous touch, suggesting that an RA contribution to the  
541 attenuation of tingle is unlikely. Moreover, in Experiments 3 and 4 we found that pressure-  
542 induced attenuation of sanshool-evoked tingling increases linearly with the indentation.  
543 Linear increase in firing rate with indentation is a characteristic marker of SA fibres [24,57],  
544 but is absent in RA fibres, which are instead mostly affected by indentation velocity [56].  
545 Thus, overall, the effects of steady pressure on sanshool-evoked tingling are consistent with  
546 steady pressure conveyed by a putative SA pathway, influencing sanshool-induced activity in  
547 a putative RA pathway.

548         Second, could our results reflect some perceptual filtering mechanism? For example,  
549 sustained pressure evokes a familiar and “meaningful” sensation, while the unnatural pattern  
550 of RA fibre activation by sanshool might be interpreted by the brain as a strange paraesthesia-  
551 like sensation. The brain might then prioritise interpretable touch signals, and filtering out the  
552 sanshool-induced signals. This top-down filtering account seems unlikely for at least two  
553 reasons. First, the account presupposes that sanshool-induced tingling is an ambiguous and  
554 unfamiliar sensation which the brain effectively discards. In fact, our participants could  
555 quickly and easily relate the tingling sensation to previous experiences, either spontaneously,  
556 or when prompted during debriefing. Common reports referred to: Szechuan cuisine, pins and  
557 needles, insects crawling on the lips, or “embouchure collapse” during brass playing.  
558 Sanshool-induced tingling is thus a clear, reportable and graded sensation, consistent with  
559 previous reports [21]. Second, our results clearly showed modulations of sanshool tingling  
560 that seem unrelated to familiarity and interpretability. For example, Experiment 6 showed that  
561 temperature of tactile stimulation systematically influenced sanshool tingling (Figure 3H). It  
562 seems implausible that these thermal modulations reflect variations in some top-down factor  
563 such as meaningfulness or interpretability of tactile stimuli. Rather, the temperature

564 dependent modulation may, instead, be explained by bottom-up factors, such as the increase  
565 of RA firing at higher temperatures [49,50] and the increase in SA channel activity at lower  
566 temperatures [24,58,59].

567 Another alternative explanation is based on the effective stimulation at the receptors  
568 themselves. Recent studies showed that action potentials are accompanied by mechanical  
569 deformations of the cell surface [60,61], as well as mechanical waves propagating throughout  
570 the axonal surface [62]. Therefore, one possibility is that sustained pressure might have  
571 changed the neural response of RA mechanoreceptors or their afferent fibres to sustained touch, as a  
572 secondary consequence of physically deforming their shape. However, the spatial tuning  
573 pattern of our effects offer evidence against this hypothesis. In Experiment 2, sustained  
574 touch-related tingling inhibition was strongest at the place of the touch stimulation itself, and  
575 at other locations on the same lip. However, we also found that the tingling sensation on the  
576 upper lip was modulated by touch on the lower lip and vice versa. Since the lips were held  
577 apart during the experiment, this modulation cannot readily be explained by the spread of  
578 mechanical input across the lips. Moreover, upper and lower lip are innervated by different  
579 branches of the trigeminal nerve (V2 and V3, respectively), which would not allow purely  
580 peripheral interactions. Finally, the time-course of suppression is inconsistent with a direct  
581 effect of sustained pressure on the RA receptor or itself, or its afferent. In Experiment 4,  
582 tingling levels were strongly suppressed immediately after static touch was applied, but then  
583 recovered significantly over the subsequent 10 s (Figure 3E). A direct mechanical effect on  
584 the RA receptor should presumably remain constant as long as sustained touch lasts. In  
585 contrast, the modest recovery of tingle with continuing pressure is consistent with a neural, as  
586 opposed to mechanical account, based on the adaptation of SA afferent firing rates.

587 Our study presents a series of limitations, which should be studied in more detail in  
588 the future. First, in our study, channels are defined *perceptually*, and their identification with

589 specific peripheral receptors and afferent fibres can only be putative. Although the  
590 physiological characteristics of sanshool are well studied in animal research [17–20], the  
591 physiological profile of peripheral mechanoreceptive activation induced by sanshool in  
592 humans has not yet been investigated directly, and is known only by psychophysical proxy  
593 measures. Future studies could potentially record single peripheral afferents from the human  
594 skin microneurographically, and identify the response of different fibre classes to sanshool  
595 applied to their respective receptive fields.

596         Second, the perceptual characteristics of sanshool tingling should be studied in more  
597 detail. In our study, we focus on the feature of flutter-level vibration, but other aspects of the  
598 sensation remain to be systematically investigated. For example, in a previous study we have  
599 shown that sanshool produces tingling at a frequency of 50 Hz [21] and impairs detection of  
600 mechanical vibrations at 30 Hz but not higher (240 Hz) or lower (1 Hz) frequencies [22]. The  
601 present study extends knowledge of sanshool’s sensory properties by confirming that the  
602 perceived intensity of sanshool tingling is dose-dependent (Experiment 3) [32].

603         Third, the duration of static touch varied widely across our experiments (10 s in  
604 Experiment 1, 2 and 4, 1 s in Experiment 3, and 4 s in experiment 6). We varied the duration  
605 of static touch because our experiments required different numbers of tactile stimulation trials,  
606 which had all to be completed within the typical duration of tingling that follows a single  
607 application of sanshool (~40 minutes). Despite the varying tactile durations, we consistently  
608 found suppression of tingling sensation, suggesting a rather general effect.

609         Finally, some of our experiments involved manual delivery of tactile stimuli. These  
610 cannot provide precise control over contact force. Given that RA mechanoreceptors are  
611 exquisitely sensitive to dynamic changes in contact force, our Experiments 1 and 2 may have  
612 included uncontrolled micromovements that activated RA channels. Nevertheless, the  
613 precisely-controlled mechanical stimuli of Experiments 3 and 4, which should have

614 drastically reduced micromovements, also produced a strong attenuation of tingling, several  
615 seconds after touch onset. These results suggest that the tactile attenuation of tingling is likely  
616 to be mediated by an SA rather than by an RA channel activated by unintended  
617 micromovements.

618         At what level in the CNS, then, would putative RA and SA channels interact? Either  
619 cortical or sub-cortical interactions are possible. Several circuit mechanisms of presynaptic  
620 inhibition have recently been described [63]. In the mouse spinal cord different types of  
621 interneurons in the dorsal horn receive inputs from multiple types of low threshold  
622 mechanoreceptor (LTMR) afferents (including RA and SA channels). Since the inhibition of  
623 pain by touch (SA channel) is thought to occur at the dorsal horn [6,64,65], the mechanism of  
624 analogous inhibition of RA activity by SA input might also be implemented sub-cortically,  
625 e.g., spinally or in trigeminal nuclei for somatic or orofacial stimuli respectively. Within  
626 somatosensory cortex, neurons in each frequency channel were originally thought to be  
627 organised in discrete functional columns[10]. However, many single neurons in area 3b/1  
628 show hybrid activity profiles responding to both RA (transient) and SA (sustained activity)  
629 mechanical input [11,15,66]. Therefore, interactions between sub-modalities may occur prior  
630 to somatosensory cortex [43].

631         What might be the functional relevance of a putative SA-RA mechanoreceptor channel  
632 interaction? A few studies have previously investigated whether vibration perception is  
633 affected by the indentation of the vibrotactile stimulator [67,68]. For example, Lowenthal and  
634 colleagues [67] found that detection thresholds for vibratory stimuli are significantly lower at  
635 higher contact force levels. However, although seemingly inconsistent with our finding that  
636 pressure inhibits vibration perception, Lowenthal's results may be due to physical interactions  
637 between the mechanical stimuli, rather than neural interactions between the resulting signals.  
638 More generally, studies with complex mechanical stimuli cannot readily rule out the

639 possibility that apparent interactions between different frequency-tuned tactile channels are in  
640 fact due to nonlinear mechanical interactions in the periphery, which influence the effective  
641 stimulation at the receptor. In contrast, by using sanshool as a chemical gateway for  
642 cutaneous receptors, we were able to reliably deliver tingling sensations in absence of any  
643 mechanical confounds (e.g. the pressure exerted by the probe of the vibrotactile stimulator).

644 To our knowledge, the current study is the first to suggest an inhibitory effect of SA on  
645 RA signalling. However, previous reports of an effect in the *reverse* direction, from RA to SA  
646 signalling, offer important clues to possible function of such interactions. Bensmaia and  
647 colleagues [69,70] showed that increasing the ratio of RA firing to SA firing impaired grating  
648 detection performance: RA input interfered with perception of fine spatial structure carried by  
649 SA. We therefore speculate that the tactile system contains mechanisms to inhibit RA channel  
650 input, to prevent masking by RA-mediated noise, and in order to maintain the robustness and  
651 stability of tactile perception. For example, when any tactile contact occurs, mechanical  
652 waves [16,71] travel through the skin, and deeper tissues. Interestingly, RA-range frequencies  
653 travel over considerable distances. We speculate that SA-induced suppression of RA firing, as  
654 reported here, could play an important role in limiting the perceptual impact of these complex  
655 mechanical interactions. Lateral inhibition between neurons with adjacent receptive fields is a  
656 pervasive feature of sensory spatial representation, serving to increase spatial acuity [72,73].  
657 Lateral inhibition occurs also for non-spatial sensory systems, such as olfaction, where it  
658 again serves to enhance perceptual resolution. Our findings are consistent with a functional  
659 hypothesis that inhibition of one frequency channel by another frequency channel functions  
660 analogously to the enhancement of spatial acuity provided by lateral inhibition. SA-mediated  
661 suppression of RA activation during normal touch may serve as a lowpass filter mechanism,  
662 allowing reliable perception of tactile events at sensorimotor timescales.



663 **Data availability**

664 All the data used for the statistical inferences of the paper are available on the Supplementary

665 Material.

## 666 **References**

- 667 1. Johnson KO. 2001 The roles and functions of cutaneous mechanoreceptors. *Curr. Opin.*  
668 *Neurobiol.* **11**, 455–461. (doi:10.1016/S0959-4388(00)00234-8)
- 669 2. Abraira VE, Ginty DD. 2013 The Sensory Neurons of Touch. *Neuron* **79**, 618–639.  
670 (doi:10.1016/j.neuron.2013.07.051)
- 671 3. McGlone F, Wessberg J, Olausson H akan. 2014 Discriminative and affective touch: sensing and  
672 feeling. *Neuron* **82**, 737–755.
- 673 4. Dubin AE, Patapoutian A. 2010 Nociceptors: the sensors of the pain pathway. *J. Clin. Invest.* **120**,  
674 3760–3772.
- 675 5. Johansson RS, Vallbo ÅB. 1983 Tactile sensory coding in the glabrous skin of the human hand.  
676 *Trends Neurosci.* **6**, 27–32. (doi:10.1016/0166-2236(83)90011-5)
- 677 6. Melzack R, Wall PD. 1967 PAIN MECHANISMS: A NEW THEORY. *Surv. Anesthesiol.* **11**, 89.
- 678 7. Mancini F, Nash T, Iannetti GD, Haggard P. 2014 Pain relief by touch: A quantitative approach.  
679 *PAIN®* **155**, 635–642. (doi:10.1016/j.pain.2013.12.024)
- 680 8. Norrsell U, Finger S, Lajonchere C. 1999 Cutaneous sensory spots and the “law of specific nerve  
681 energies”: history and development of ideas. *Brain Res. Bull.* **48**, 457–465. (doi:10.1016/S0361-  
682 9230(98)00067-7)
- 683 9. Gescheider GA, Wright JH, Verrillo RT. 2010 *Information-processing channels in the tactile*  
684 *sensory system: A psychophysical and physiological analysis*. Psychology press.
- 685 10. Mountcastle VB. 1957 Modality and topographic properties of single neurons of cat’s somatic  
686 sensory cortex. *J. Neurophysiol.* **20**, 408–434.
- 687 11. Sur M, Wall JT, Kaas JH. 1981 Modular segregation of functional cell classes within the  
688 postcentral somatosensory cortex of monkeys. *Science* **212**, 1059–1061.
- 689 12. Friedman RM, Chen LM, Roe AW. 2004 Modality maps within primate somatosensory cortex.  
690 *Proc. Natl. Acad. Sci.* **101**, 12724–12729. (doi:10.1073/pnas.0404884101)
- 691 13. Romo R, Hernández A, Zainos A, Brody CD, Lemus L. 2000 Sensing without touching:  
692 psychophysical performance based on cortical microstimulation. *Neuron* **26**, 273–278.
- 693 14. Saal HP, Bensmaia SJ. 2014 Touch is a team effort: interplay of submodalities in cutaneous  
694 sensibility. *Trends Neurosci.* **37**, 689–697. (doi:10.1016/j.tins.2014.08.012)
- 695 15. Pei Y-C, Denchev PV, Hsiao SS, Craig JC, Bensmaia SJ. 2009 Convergence of Submodality-Specific  
696 Input Onto Neurons in Primary Somatosensory Cortex. *J. Neurophysiol.* **102**, 1843–1853.  
697 (doi:10.1152/jn.00235.2009)
- 698 16. Shao Y, Hayward V, Visell Y. 2016 Spatial patterns of cutaneous vibration during whole-hand  
699 haptic interactions. *Proc. Natl. Acad. Sci.* **113**, 4188–4193.

- 700 17. Bautista DM, Sigal YM, Milstein AD, Garrison JL, Zorn JA, Tsuruda PR, Nicoll RA, Julius D. 2008  
701 Pungent agents from Szechuan peppers excite sensory neurons by inhibiting two-pore  
702 potassium channels. *Nat. Neurosci.* **11**, 772–779. (doi:10.1038/nn.2143)
- 703 18. Bryant BP, Mezzine I. 1999 Alkylamides that produce tingling paresthesia activate tactile and  
704 thermal trigeminal neurons. *Brain Res.* **842**, 452–460. (doi:10.1016/S0006-8993(99)01878-8)
- 705 19. Klein AH *et al.* 2011 A tingling sanshool derivative excites primary sensory neurons and elicits  
706 nocifensive behavior in rats. *J. Neurophysiol.* **105**, 1701–1710. (doi:10.1152/jn.00922.2010)
- 707 20. Lennertz RC, Tsunozaki M, Bautista DM, Stucky CL. 2010 Physiological basis of tingling  
708 paresthesia evoked by hydroxy-alpha-sanshool. *J. Neurosci. Off. J. Soc. Neurosci.* **30**, 4353–4361.  
709 (doi:10.1523/JNEUROSCI.4666-09.2010)
- 710 21. Hagura N, Barber H, Haggard P. 2013 Food vibrations: Asian spice sets lips trembling. *Proc. R.*  
711 *Soc. B Biol. Sci.* **280**, 20131680–20131680. (doi:10.1098/rspb.2013.1680)
- 712 22. Kuroki S, Hagura N, Nishida S, Haggard P, Watanabe J. 2016 Sanshool on The Fingertip Interferes  
713 with Vibration Detection in a Rapidly-Adapting (RA) Tactile Channel. *PLOS ONE* **11**, e0165842.  
714 (doi:10.1371/journal.pone.0165842)
- 715 23. Chruma JJ, Cullen DJ, Bowman L, Toy PH. 2018 Polyunsaturated fatty acid amides from the  
716 Zanthoxylum genus – from culinary curiosities to probes for chemical biology. *Nat. Prod. Rep.*  
717 **35**, 54–74. (doi:10.1039/C7NP00044H)
- 718 24. Iggo A, Muir AR. 1969 The structure and function of a slowly adapting touch corpuscle in hairy  
719 skin. *J. Physiol.* **200**, 763–796.
- 720 25. Haggard P, de Boer L. 2014 Oral somatosensory awareness. *Neurosci. Biobehav. Rev.* **47**, 469–  
721 484.
- 722 26. Piccinin MA, Zito PM. 2019 Anatomy, Head and Neck, Lips. In *StatPearls [Internet]*, StatPearls  
723 Publishing.
- 724 27. Nagi SS *et al.* 2019 An ultrafast system for signaling mechanical pain in human skin. *Sci. Adv.* **5**,  
725 eaaw1297. (doi:10.1126/sciadv.aaw1297)
- 726 28. Gokin AP, Philip B, Strichartz GR. 2001 Preferential Block of Small Myelinated Sensory and Motor  
727 Fibers by Lidocaine In Vivo Electrophysiology in the Rat Sciatic Nerve. *Anesthesiol. J. Am. Soc.*  
728 *Anesthesiol.* **95**, 1441–1454.
- 729 29. Sheets PL, Jarecki BW, Cummins TR. 2011 Lidocaine reduces the transition to slow inactivation in  
730 Nav1.7 voltage-gated sodium channels. *Br. J. Pharmacol.* **164**, 719–730.
- 731 30. Mouraux A, Iannetti GD, Plaghki L. 2010 Low intensity intra-epidermal electrical stimulation can  
732 activate A $\delta$ -nociceptors selectively. *Pain* **150**, 199–207.
- 733 31. Paqueron X, Leguen M, Rosenthal D, Coriat P, Willer JC, Danziger N. 2003 The phenomenology of  
734 body image distortions induced by regional anaesthesia. *Brain* **126**, 702–712.  
735 (doi:10.1093/brain/awg063)
- 736 32. Albin KC, Simons CT. 2010 Psychophysical evaluation of a sanshool derivative (alkylamide) and  
737 the elucidation of mechanisms subserving tingle. *PLoS One* **5**, e9520.

- 738 33. Levitt H. 1971 Transformed up-down methods in psychoacoustics. *J. Acoust. Soc. Am.* **49**, 467–  
739 477.
- 740 34. Olausson H akan, Wessberg J, McGlone F, Vallbo \AAke. 2010 The neurophysiology of  
741 unmyelinated tactile afferents. *Neurosci. Biobehav. Rev.* **34**, 185–191.
- 742 35. Ackerley R, Wasling HB, Liljencrantz J, Olausson H akan, Johnson RD, Wessberg J. 2014 Human C-  
743 tactile afferents are tuned to the temperature of a skin-stroking caress. *J. Neurosci.* **34**, 2879–  
744 2883.
- 745 36. Löken LS, Wessberg J, McGlone F, Olausson H akan. 2009 Coding of pleasant touch by  
746 unmyelinated afferents in humans. *Nat. Neurosci.* **12**, 547.
- 747 37. Djouhri L. 2016 Electrophysiological evidence for the existence of a rare population of C-fiber  
748 low threshold mechanoreceptive (C-LTM) neurons in glabrous skin of the rat hindpaw. *Neurosci.*  
749 *Lett.* **613**, 25–29. (doi:10.1016/j.neulet.2015.12.040)
- 750 38. Nagi SS, Mahns DA. 2013 Mechanical allodynia in human glabrous skin mediated by low-  
751 threshold cutaneous mechanoreceptors with unmyelinated fibres. *Exp. Brain Res.* **231**, 139–151.  
752 (doi:10.1007/s00221-013-3677-z)
- 753 39. Nagi SS, Dunn JS, Birznieks I, Vickery RM, Mahns DA. 2015 The effects of preferential A- and C-  
754 fibre blocks and T-type calcium channel antagonist on detection of low-force monofilaments in  
755 healthy human participants. *BMC Neurosci.* **16**, 52. (doi:10.1186/s12868-015-0190-2)
- 756 40. Rouder JN, Speckman PL, Sun D, Morey RD, Iverson G. 2009 Bayesian t tests for accepting and  
757 rejecting the null hypothesis. *Psychon. Bull. Rev.* **16**, 225–237.
- 758 41. Wetzels R, Wagenmakers E-J. 2012 A default Bayesian hypothesis test for correlations and  
759 partial correlations. *Psychon. Bull. Rev.* **19**, 1057–1064. (doi:10.3758/s13423-012-0295-x)
- 760 42. Saal HP, Harvey MA, Bensmaia SJ. 2015 Rate and timing of cortical responses driven by separate  
761 sensory channels. *eLife* **4**, e10450. (doi:10.7554/eLife.10450)
- 762 43. Jörntell H, Bengtsson F, Geborek P, Spanne A, Terekhov AV, Hayward V. 2014 Segregation of  
763 tactile input features in neurons of the cuneate nucleus. *Neuron* **83**, 1444–1452.
- 764 44. Gescheider G, Wright J, Verrillo R. 2009 *Information-processing channels in the tactile sensory*  
765 *system: A psychophysical and physiological analysis* New York. Taylor & Francis Group, LLC.
- 766 45. Nishida S, Johnston A. 1999 Influence of motion signals on the perceived position of spatial  
767 pattern. *Nature* **397**, 610–612. (doi:10.1038/17600)
- 768 46. Trulsson M, Essick GK. 2010 Sensations evoked by microstimulation of single mechanoreceptive  
769 afferents innervating the human face and mouth. *J. Neurophysiol.* **103**, 1741–1747.
- 770 47. Nordin M. 1990 Low-threshold mechanoreceptive and nociceptive units with unmyelinated (C)  
771 fibres in the human supraorbital nerve. *J. Physiol.* **426**, 229–240.
- 772 48. Samour MS, Nagi SS, Mahns DA. 2015 Cav3.2-expressing low-threshold C fibres in human hairy  
773 skin contribute to cold allodynia—a non-TRPV1- and non-TRPM8-dependent phenomenon: *PAIN*  
774 **156**, 1566–1575. (doi:10.1097/j.pain.000000000000202)

- 775 49. Jia Z, Ling J, Gu JG. 2012 Temperature dependence of rapidly adapting mechanically activated  
776 currents in rat dorsal root ganglion neurons. *Neurosci. Lett.* **522**, 79–84.  
777 (doi:10.1016/j.neulet.2012.06.024)
- 778 50. Green BG, Lederman SJ, Stevens JC. 1979 The effect of skin temperature on the perception of  
779 roughness. *Sens. Processes* **3**, 327–333.
- 780 51. Romo R, Hernández A, Zainos A, Salinas E. 1998 Somatosensory discrimination based on cortical  
781 microstimulation. *Nature* **392**, 387–390. (doi:10.1038/32891)
- 782 52. Nordin M, Nyström B, Wallin U, Hagbarth K-E. 1984 Ectopic sensory discharges and paresthesiae  
783 in patients with disorders of peripheral nerves, dorsal roots and dorsal columns. *Pain* **20**, 231–  
784 245.
- 785 53. Ochoa JL, Torebjörk H. 1980 Paraesthesiae from ectopic impulse generation in human sensory  
786 nerves. *Brain J. Neurol.* **103**, 835–853.
- 787 54. Craig JC. 1976 Attenuation of vibrotactile spatial summation. *Sens. Processes* **1**, 40–56.
- 788 55. Sherrick CE. 1964 Effects of Double Simultaneous Stimulation of the Skin. *Am. J. Psychol.* **77**, 42–  
789 53. (doi:10.2307/1419270)
- 790 56. Knibestöl M. 1973 Stimulus—response functions of rapidly adapting mechanoreceptors in the  
791 human glabrous skin area. *J. Physiol.* **232**, 427–452. (doi:10.1113/jphysiol.1973.sp010279)
- 792 57. Knibestöl M. 1975 Stimulus-response functions of slowly adapting mechanoreceptors in the  
793 human glabrous skin area. *J. Physiol.* **245**, 63–80. (doi:10.1113/jphysiol.1975.sp010835)
- 794 58. Buckingham G. 2014 Getting a grip on heaviness perception: A review of weight illusions and  
795 their probable causes. *Exp. Brain Res.* **232**, 1623–1629.
- 796 59. Dunn JS, Mahns DA, Nagi SS. 2017 Why does a cooled object feel heavier? Psychophysical  
797 investigations into the Weber’s Phenomenon. *BMC Neurosci.* **18**, 4.
- 798 60. Fillafer C, Mussel M, Muchowski J, Schneider MF. 2018 On cell surface deformation during an  
799 action potential. *Biophys. J.* **114**, 410–418. (doi:10.1016/j.bpj.2017.11.3776)
- 800 61. Iwasa K, Tasaki I, Gibbons RC. 1980 Swelling of nerve fibers associated with action potentials.  
801 *Science* **210**, 338–339. (doi:10.1126/science.7423196)
- 802 62. El Hady A, Machta BB. 2015 Mechanical surface waves accompany action potential propagation.  
803 *Nat. Commun.* **6**. (doi:10.1038/ncomms7697)
- 804 63. Zimmerman AL, Kovatsis EM, Pozsgai RY, Tasnim A, Zhang Q, Ginty DD. 2019 Distinct Modes of  
805 Presynaptic Inhibition of Cutaneous Afferents and Their Functions in Behavior. *Neuron* **102**, 420–  
806 434.e8. (doi:10.1016/j.neuron.2019.02.002)
- 807 64. Kakigi R, Shibasaki H. 1992 Mechanisms of pain relief by vibration and movement. *J. Neurol.*  
808 *Neurosurg. Psychiatry* **55**, 282–286. (doi:10.1136/jnnp.55.4.282)
- 809 65. Watanabe I, Svensson P, Arendt-Nielsen L. 1999 Influence of segmental and extra-segmental  
810 conditioning stimuli on cortical potentials evoked by painful electrical stimulation. *Somatosens.*  
811 *Mot. Res.* **16**, 243–250. (doi:10.1080/08990229970492)

- 812 66. Sur M, Wall JT, Kaas JH. 1984 Modular distribution of neurons with slowly adapting and rapidly  
813 adapting responses in area 3b of somatosensory cortex in monkeys. *J. Neurophysiol.* **51**, 724–  
814 744.
- 815 67. Lowenthal LM, Derek T, Hockaday R. 1987 Vibration Sensory Thresholds Depend On Pressure of  
816 Applied Stimulus. *Diabetes Care* **10**, 100–102. (doi:10.2337/diacare.10.1.100)
- 817 68. Cohen LH, Lindley SB. 1938 Studies in Vibratory Sensibility. *Am. J. Psychol.* **51**, 44–63.  
818 (doi:10.2307/1416415)
- 819 69. Bensmaïa SJ, Craig JC, Yoshioka T, Johnson KO. 2006 SA1 and RA afferent responses to static and  
820 vibrating gratings. *J. Neurophysiol.*
- 821 70. Bensmaïa SJ, Craig JC, Johnson KO. 2006 Temporal factors in tactile spatial acuity: evidence for  
822 RA interference in fine spatial processing. *J. Neurophysiol.*
- 823 71. Miller LE, Montroni L, Koun E, Salemme R, Hayward V, Farnè A. 2018 Sensing with tools extends  
824 somatosensory processing beyond the body. *Nature* **561**, 239.
- 825 72. von Békésy G. 1967 Mach band type lateral inhibition in different sense organs. *J. Gen. Physiol.*  
826 **50**, 519–532.
- 827 73. DiCarlo JJ, Johnson KO, Hsiao SS. 1998 Structure of receptive fields in area 3b of primary  
828 somatosensory cortex in the alert monkey. *J. Neurosci.* **18**, 2626–2645.
- 829

830 **Acknowledgements**

831 This research was supported by an MRC project grant MR/M013901/1 to PH. AC and PH  
832 were further supported by a donation by Dr Shamil Chandaria to the Institute of Philosophy,  
833 School of Advanced Study, University of London. NH is supported by Japan Society for the  
834 Promotion of Science (Kakenhi 26119535, 18H01106) and ERATO (JPMJER1801). YH is  
835 supported by The Great Britain Sasakawa Foundation. We are grateful to Indena SPA (Milan,  
836 Italy) for providing ZANTHALENE used for the study.

837

838 **Author Contribution**

839 AC, NH and PH conceived the study. NH and PH designed, and YH and NH collected and  
840 analysed the data for Experiments 1 and 2. AC and PH designed, and AC collected and  
841 analysed the data for Experiments 3-6. AC, NH, and PH wrote the paper. All the authors  
842 reviewed the paper.

843

844 **Competing Interests**

845 The authors declare no competing interests.

## A Experiment 1

bioRxiv preprint doi: <https://doi.org/10.1101/2020.11.21.391458>; this version posted November 22, 2020. The copyright holder for this preprint (which was not certified by peer review) is the author/funder, who has granted bioRxiv a license to display the preprint in perpetuity. It is made available under aCC-BY-NC-ND 4.0 International license.

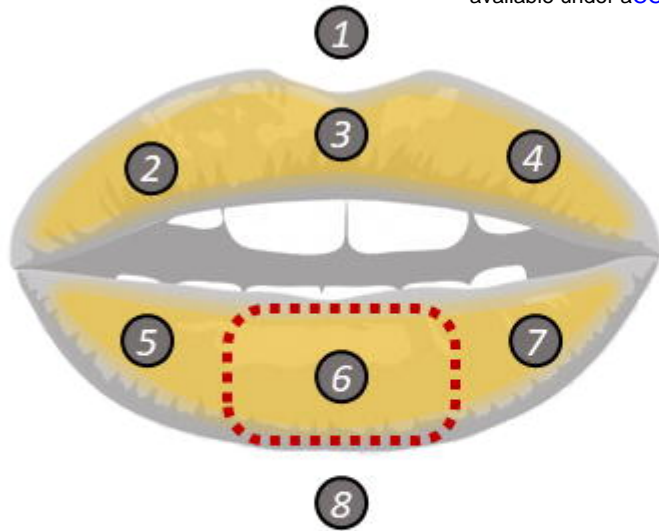

## B Experiment 2

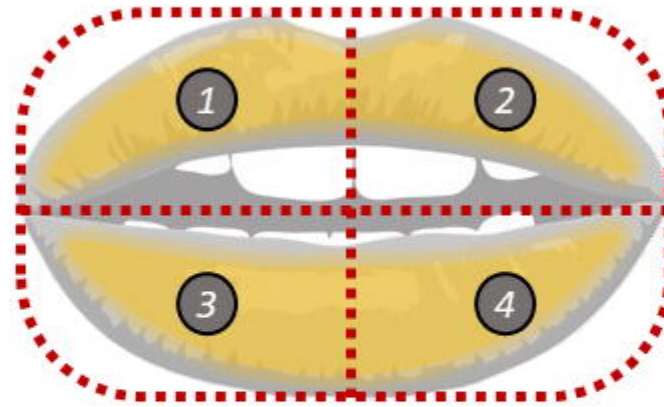

1 Mechanical stimulus location (~1.5 N)

Sanshool (20% solution)

Target area for tingling ratings

## C Experiment 3

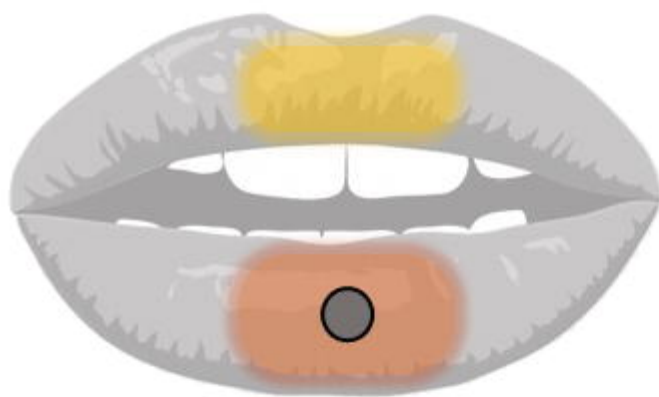

## D Experiment 4

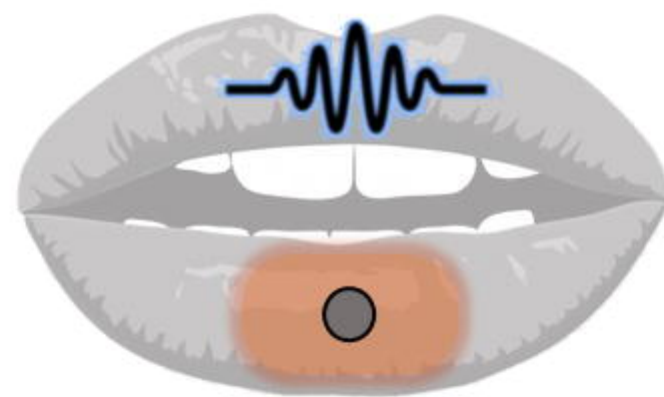

Mechanical stimulus location (0.05 – 0.5 N)

Sanshool (20% solution)

Sanshool (80% solution)

Vibrotactile matching stimulus

## E Experiment 5

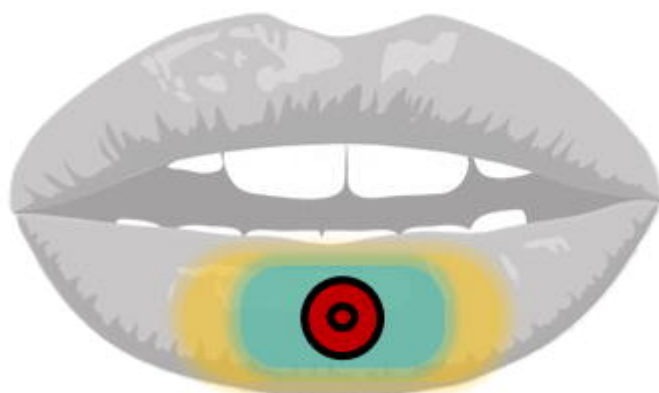

## F Experiment 6

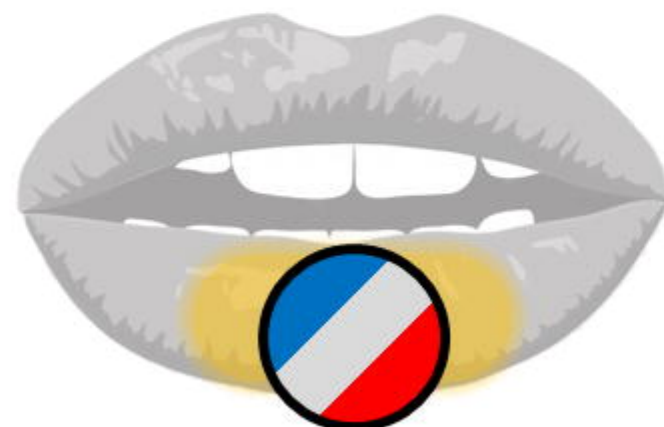

Concentric bipolar electrode (C-fibre stimulus)

Lidocaine (0.9% solution)

Sanshool (20% solution)

Thermotactile stimulus (21°, 33°, 41°C)



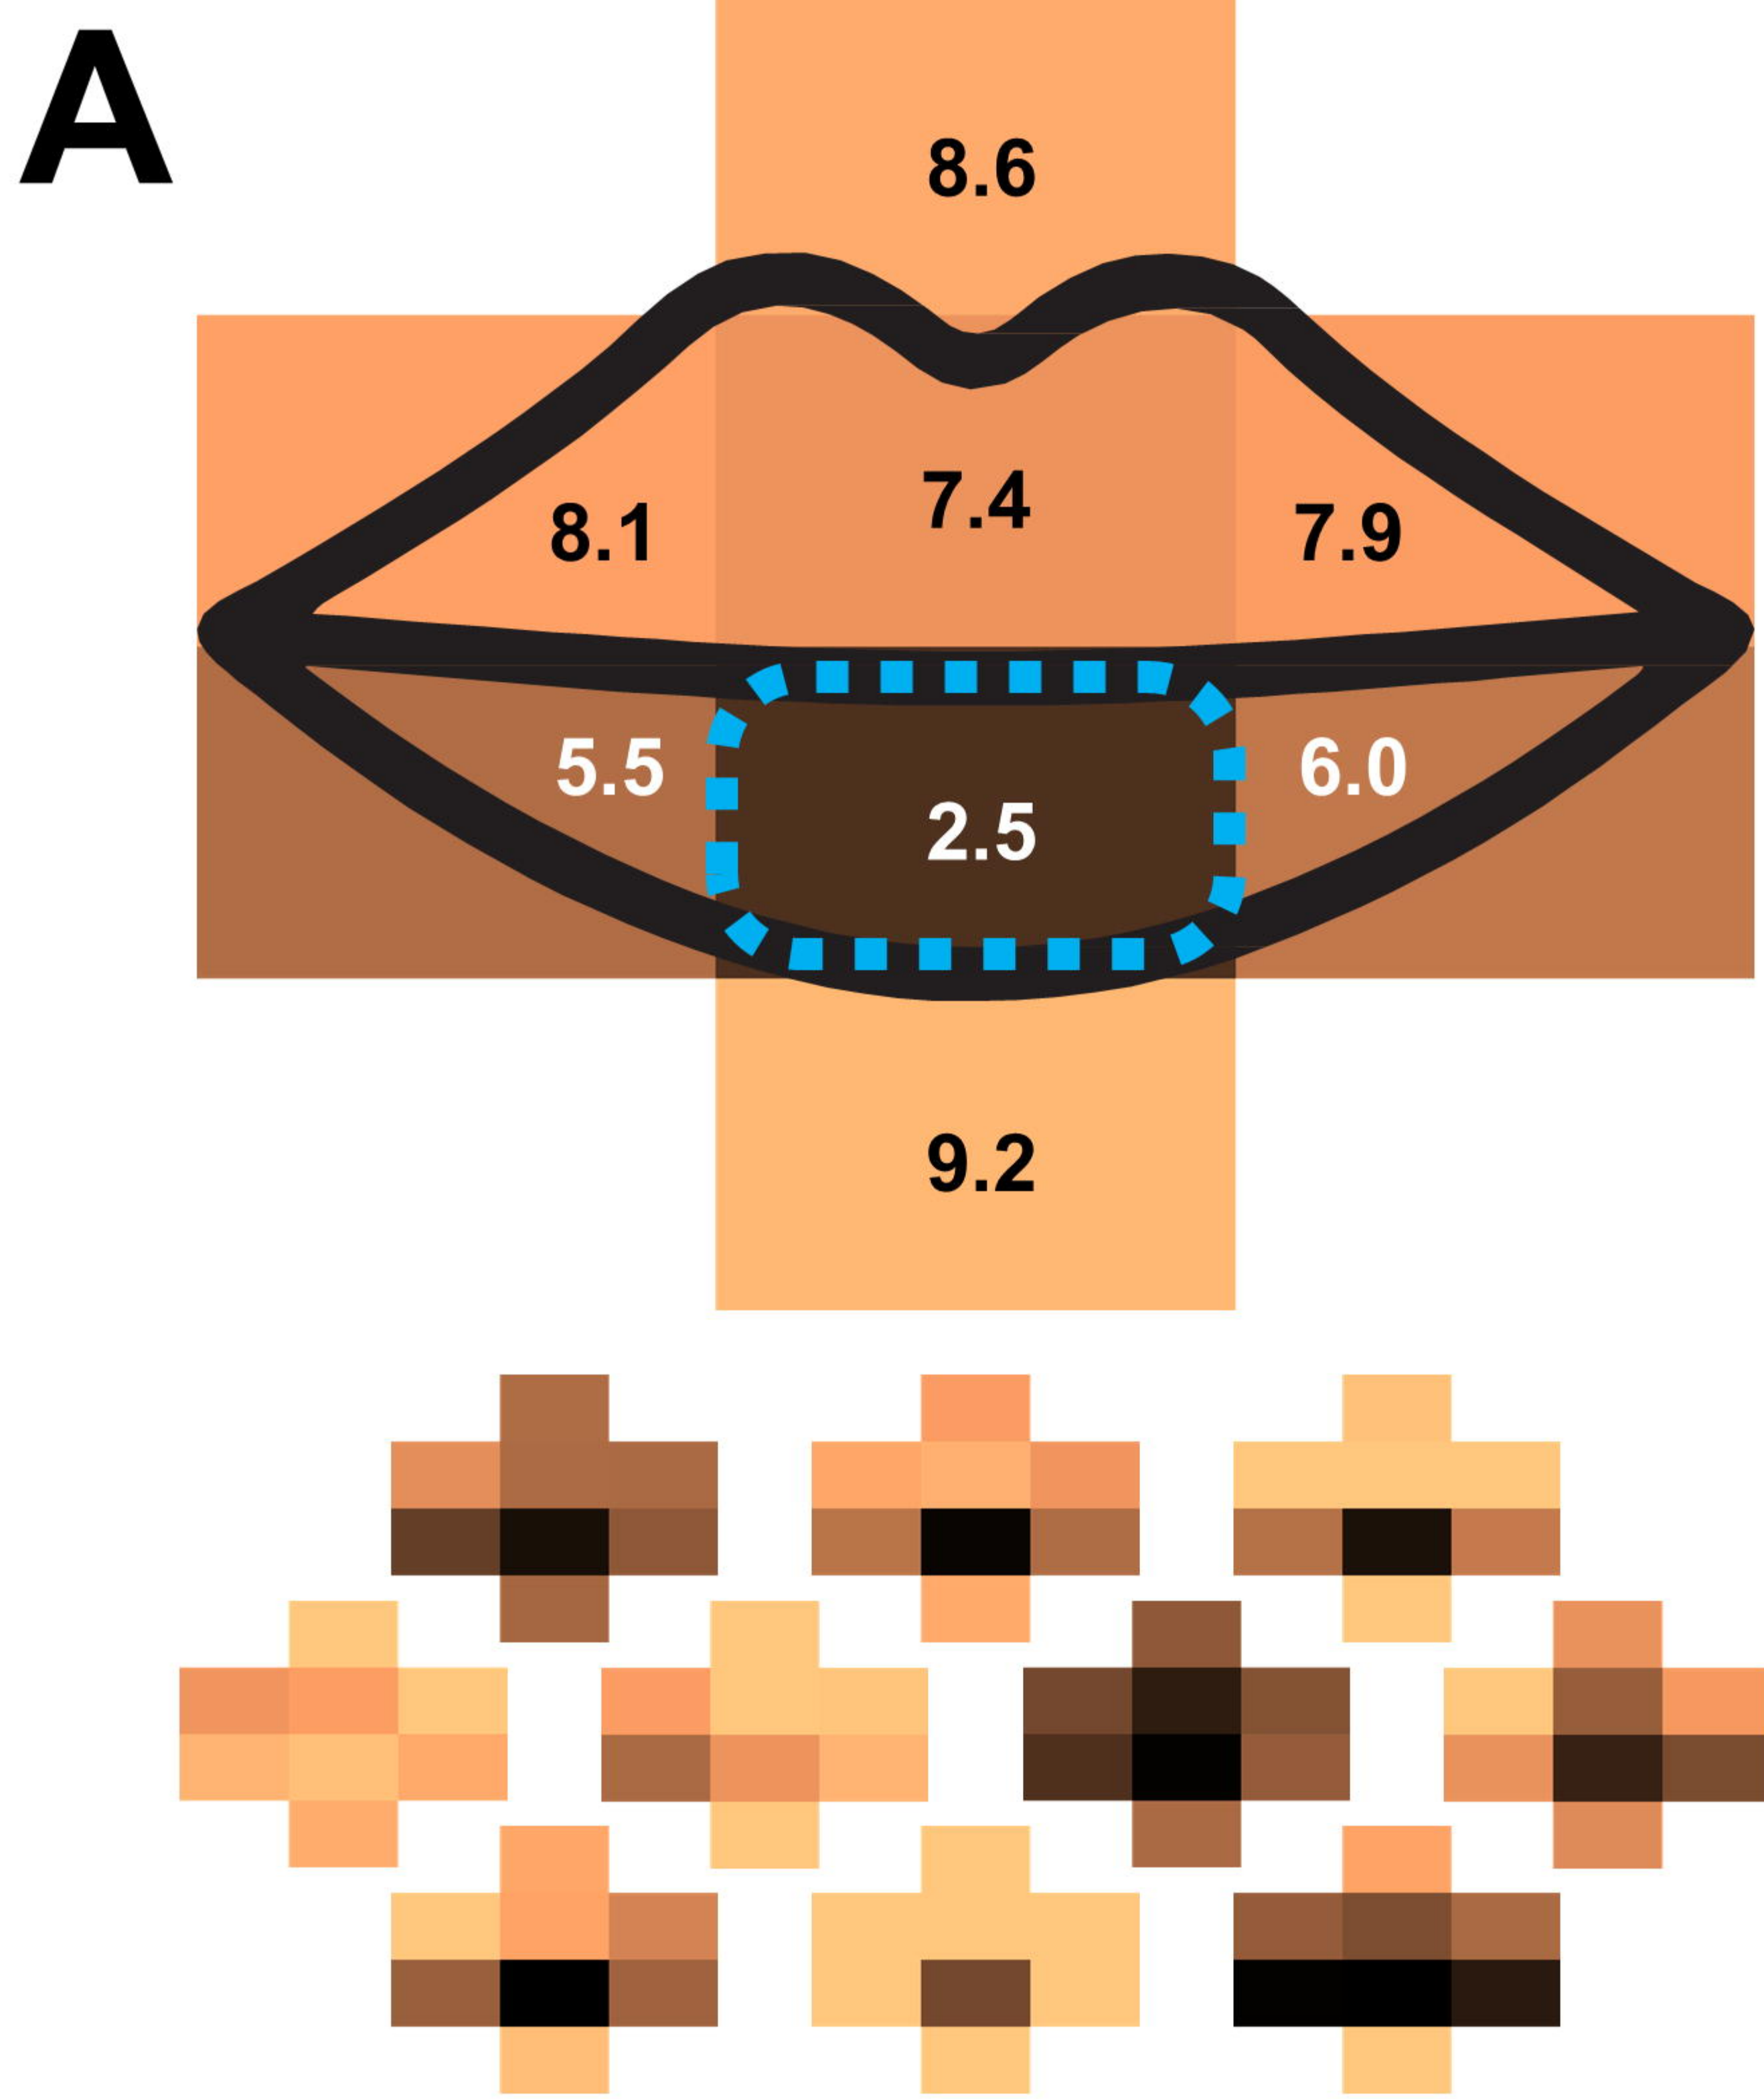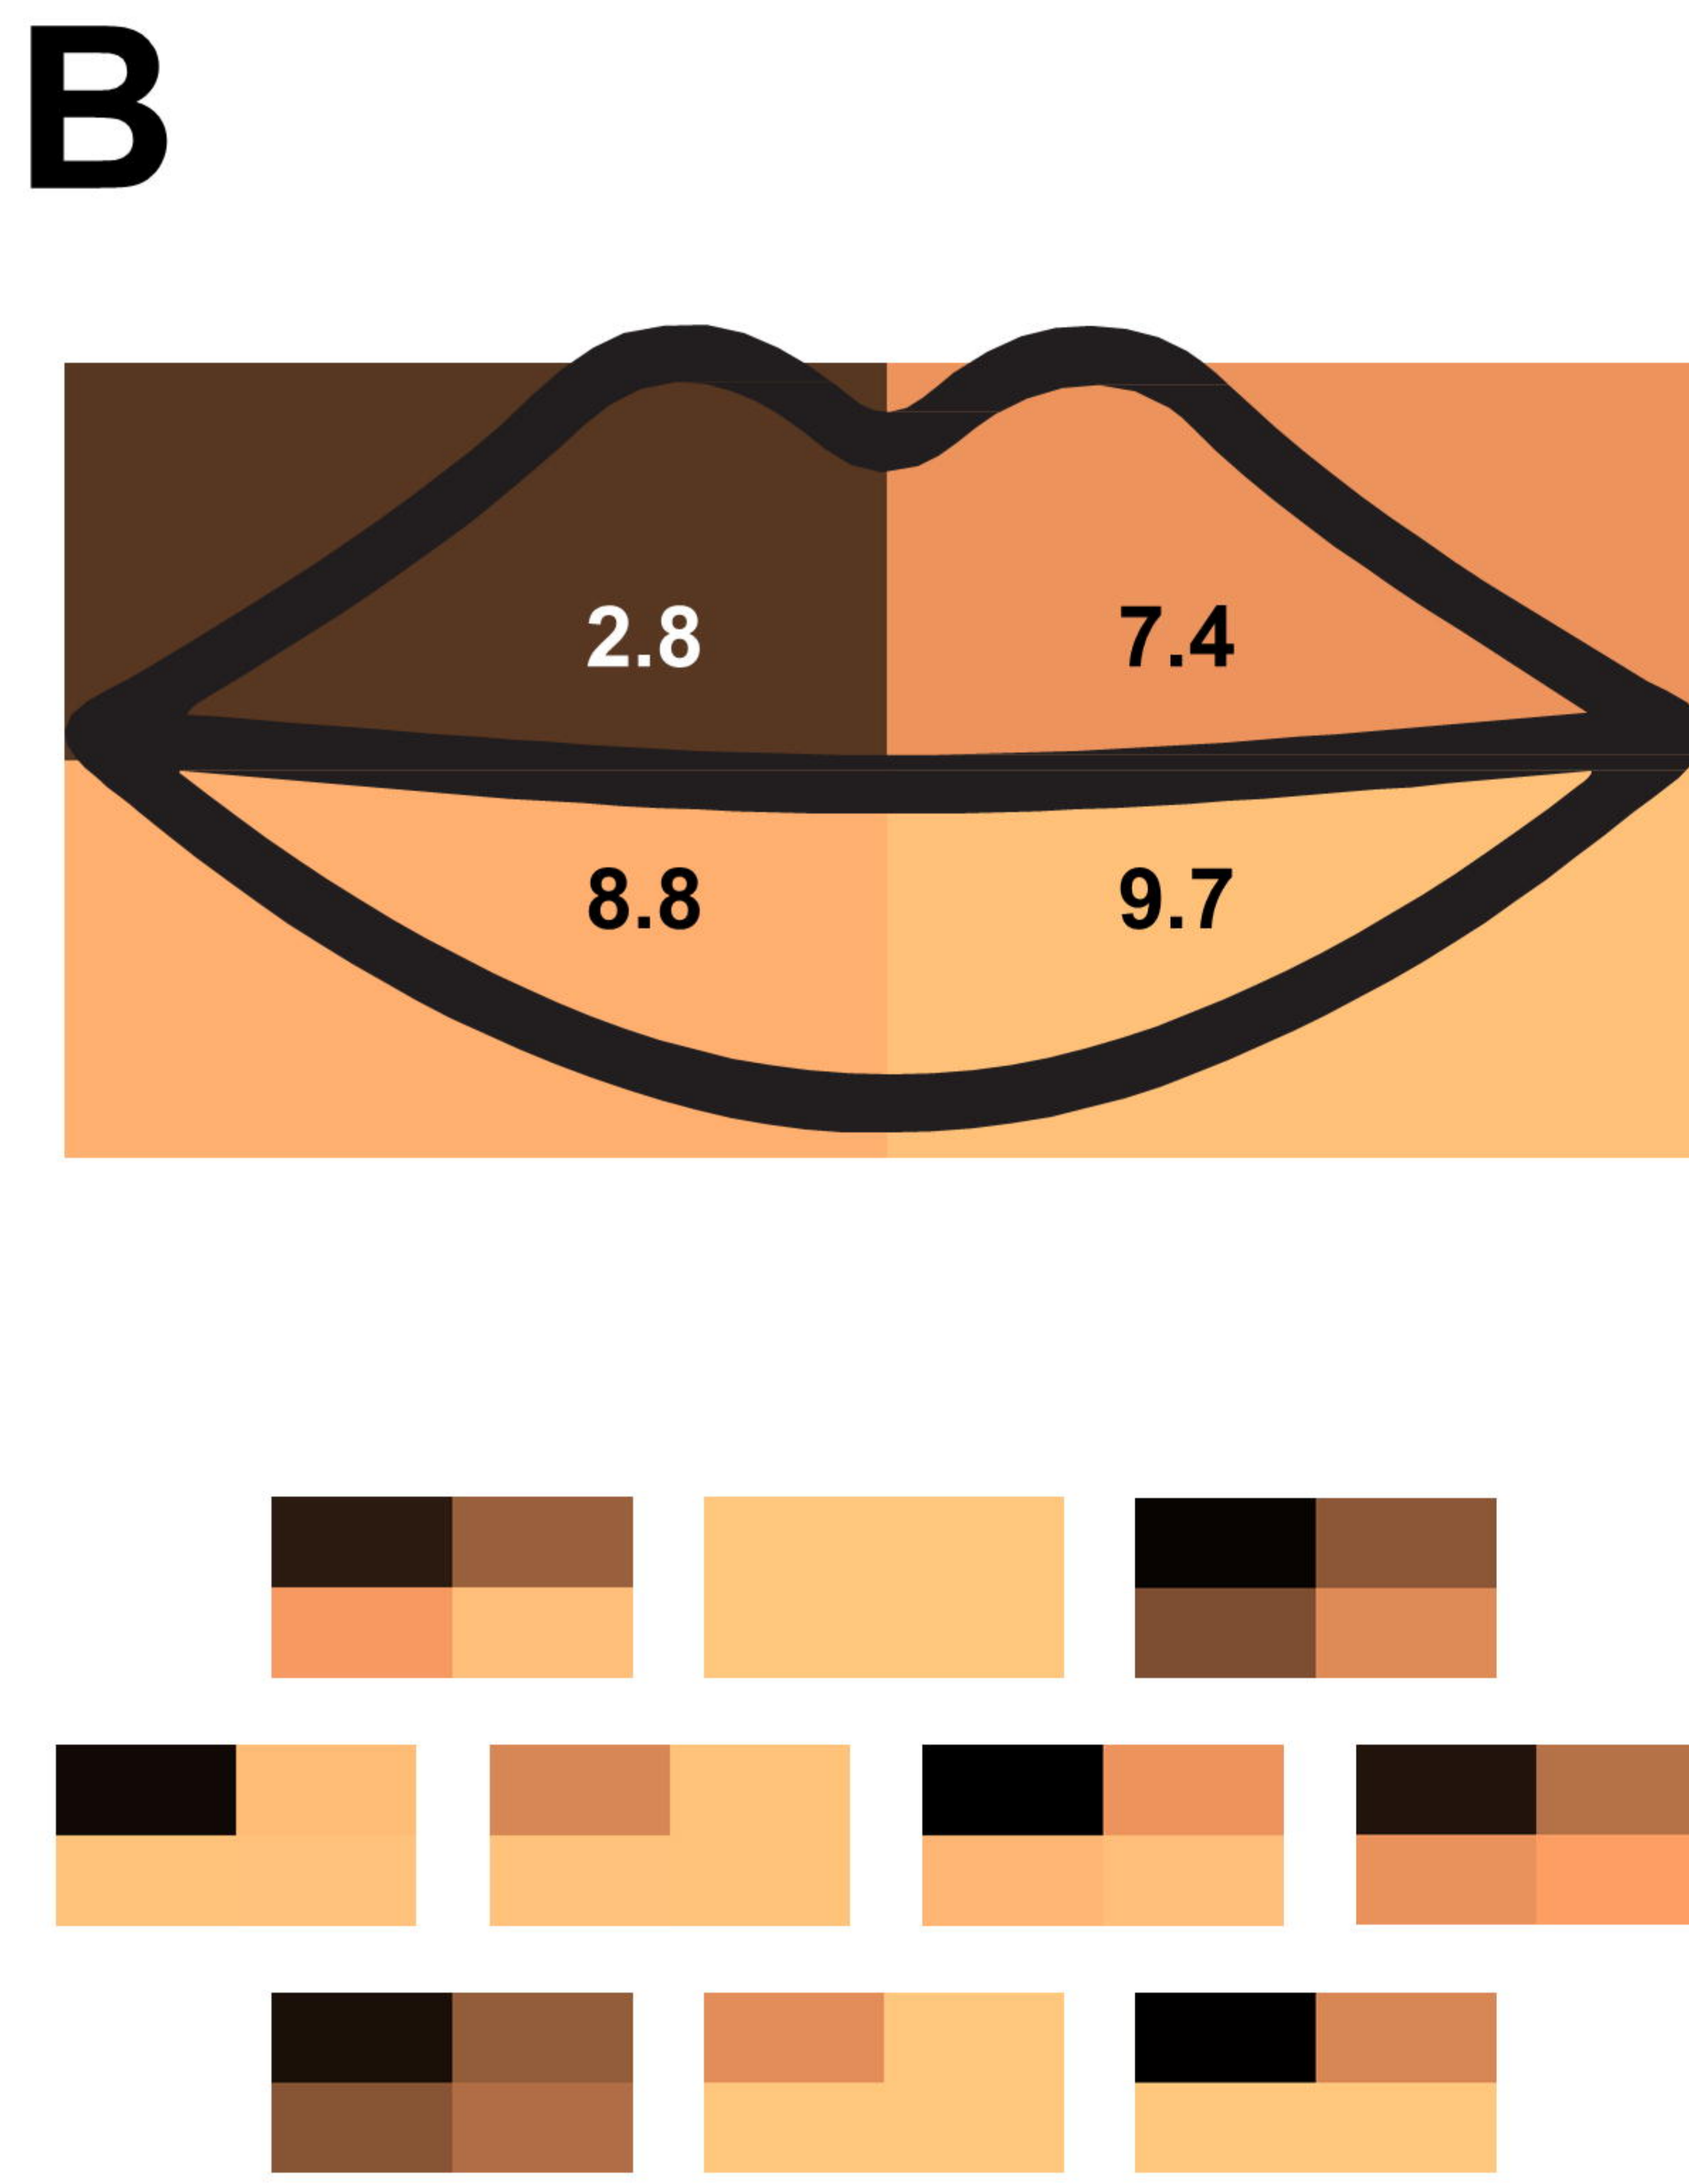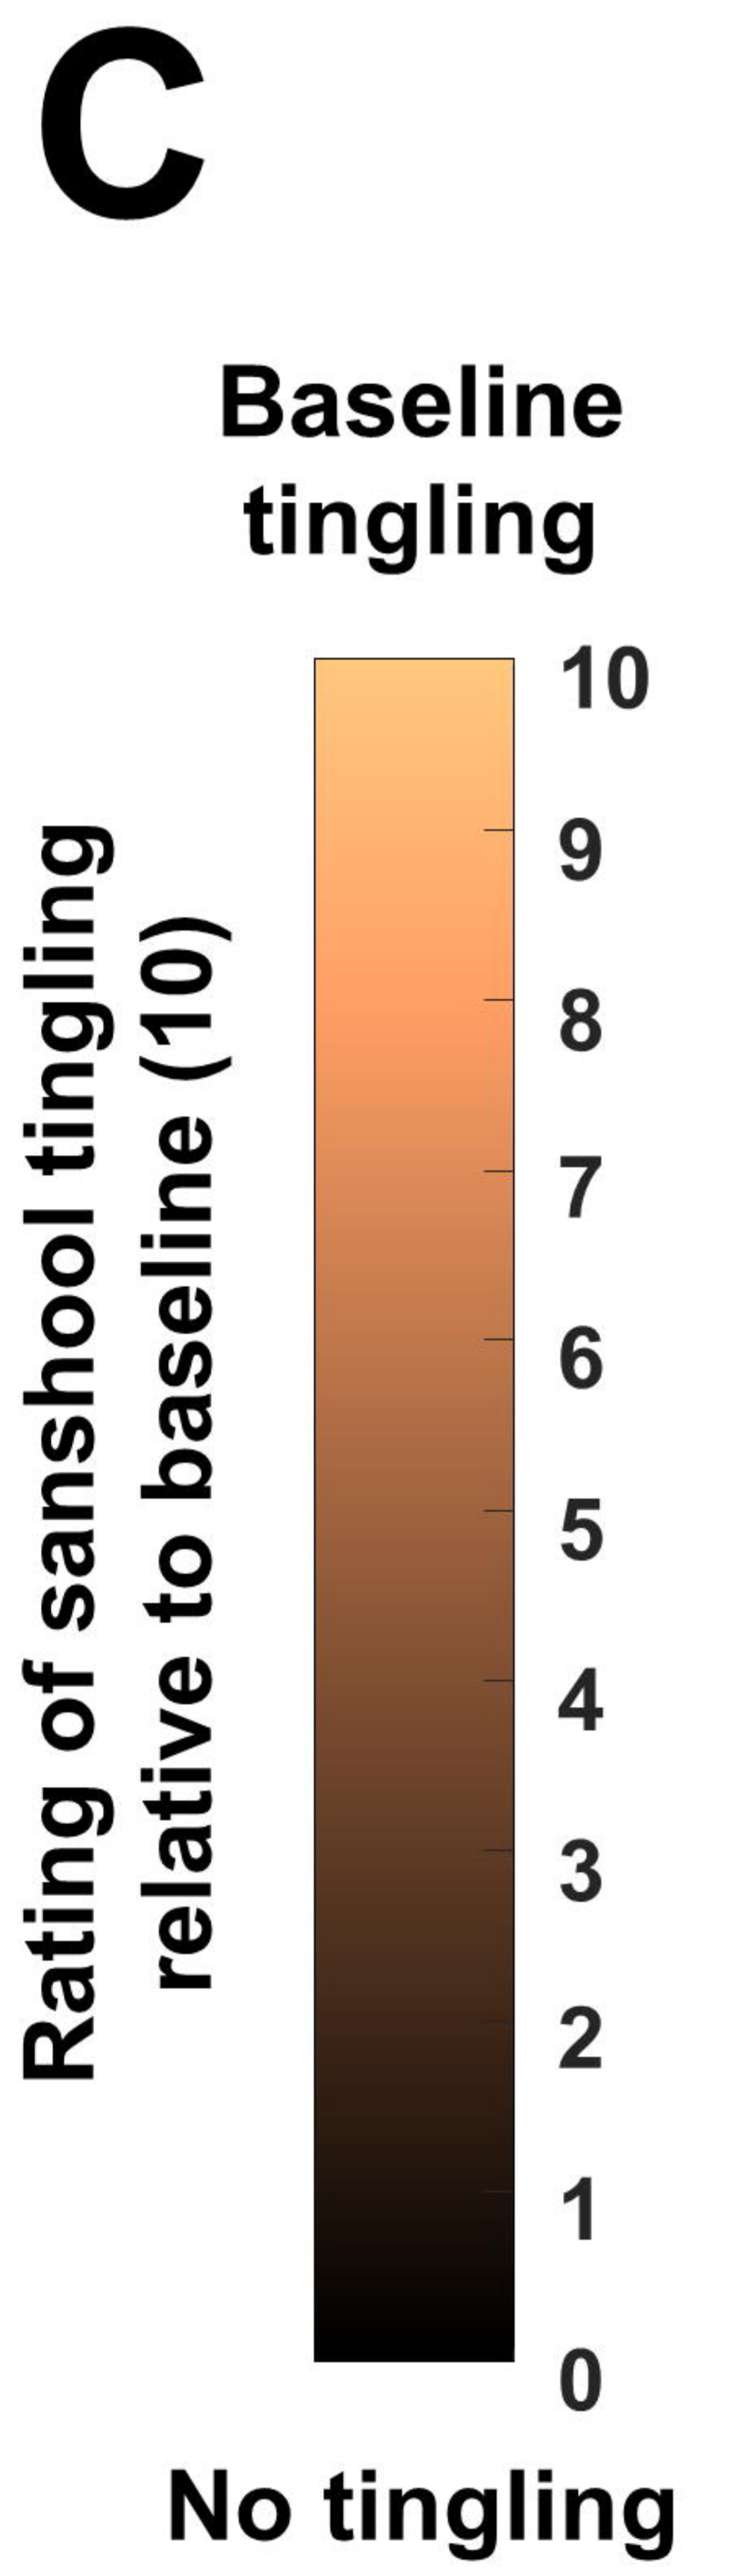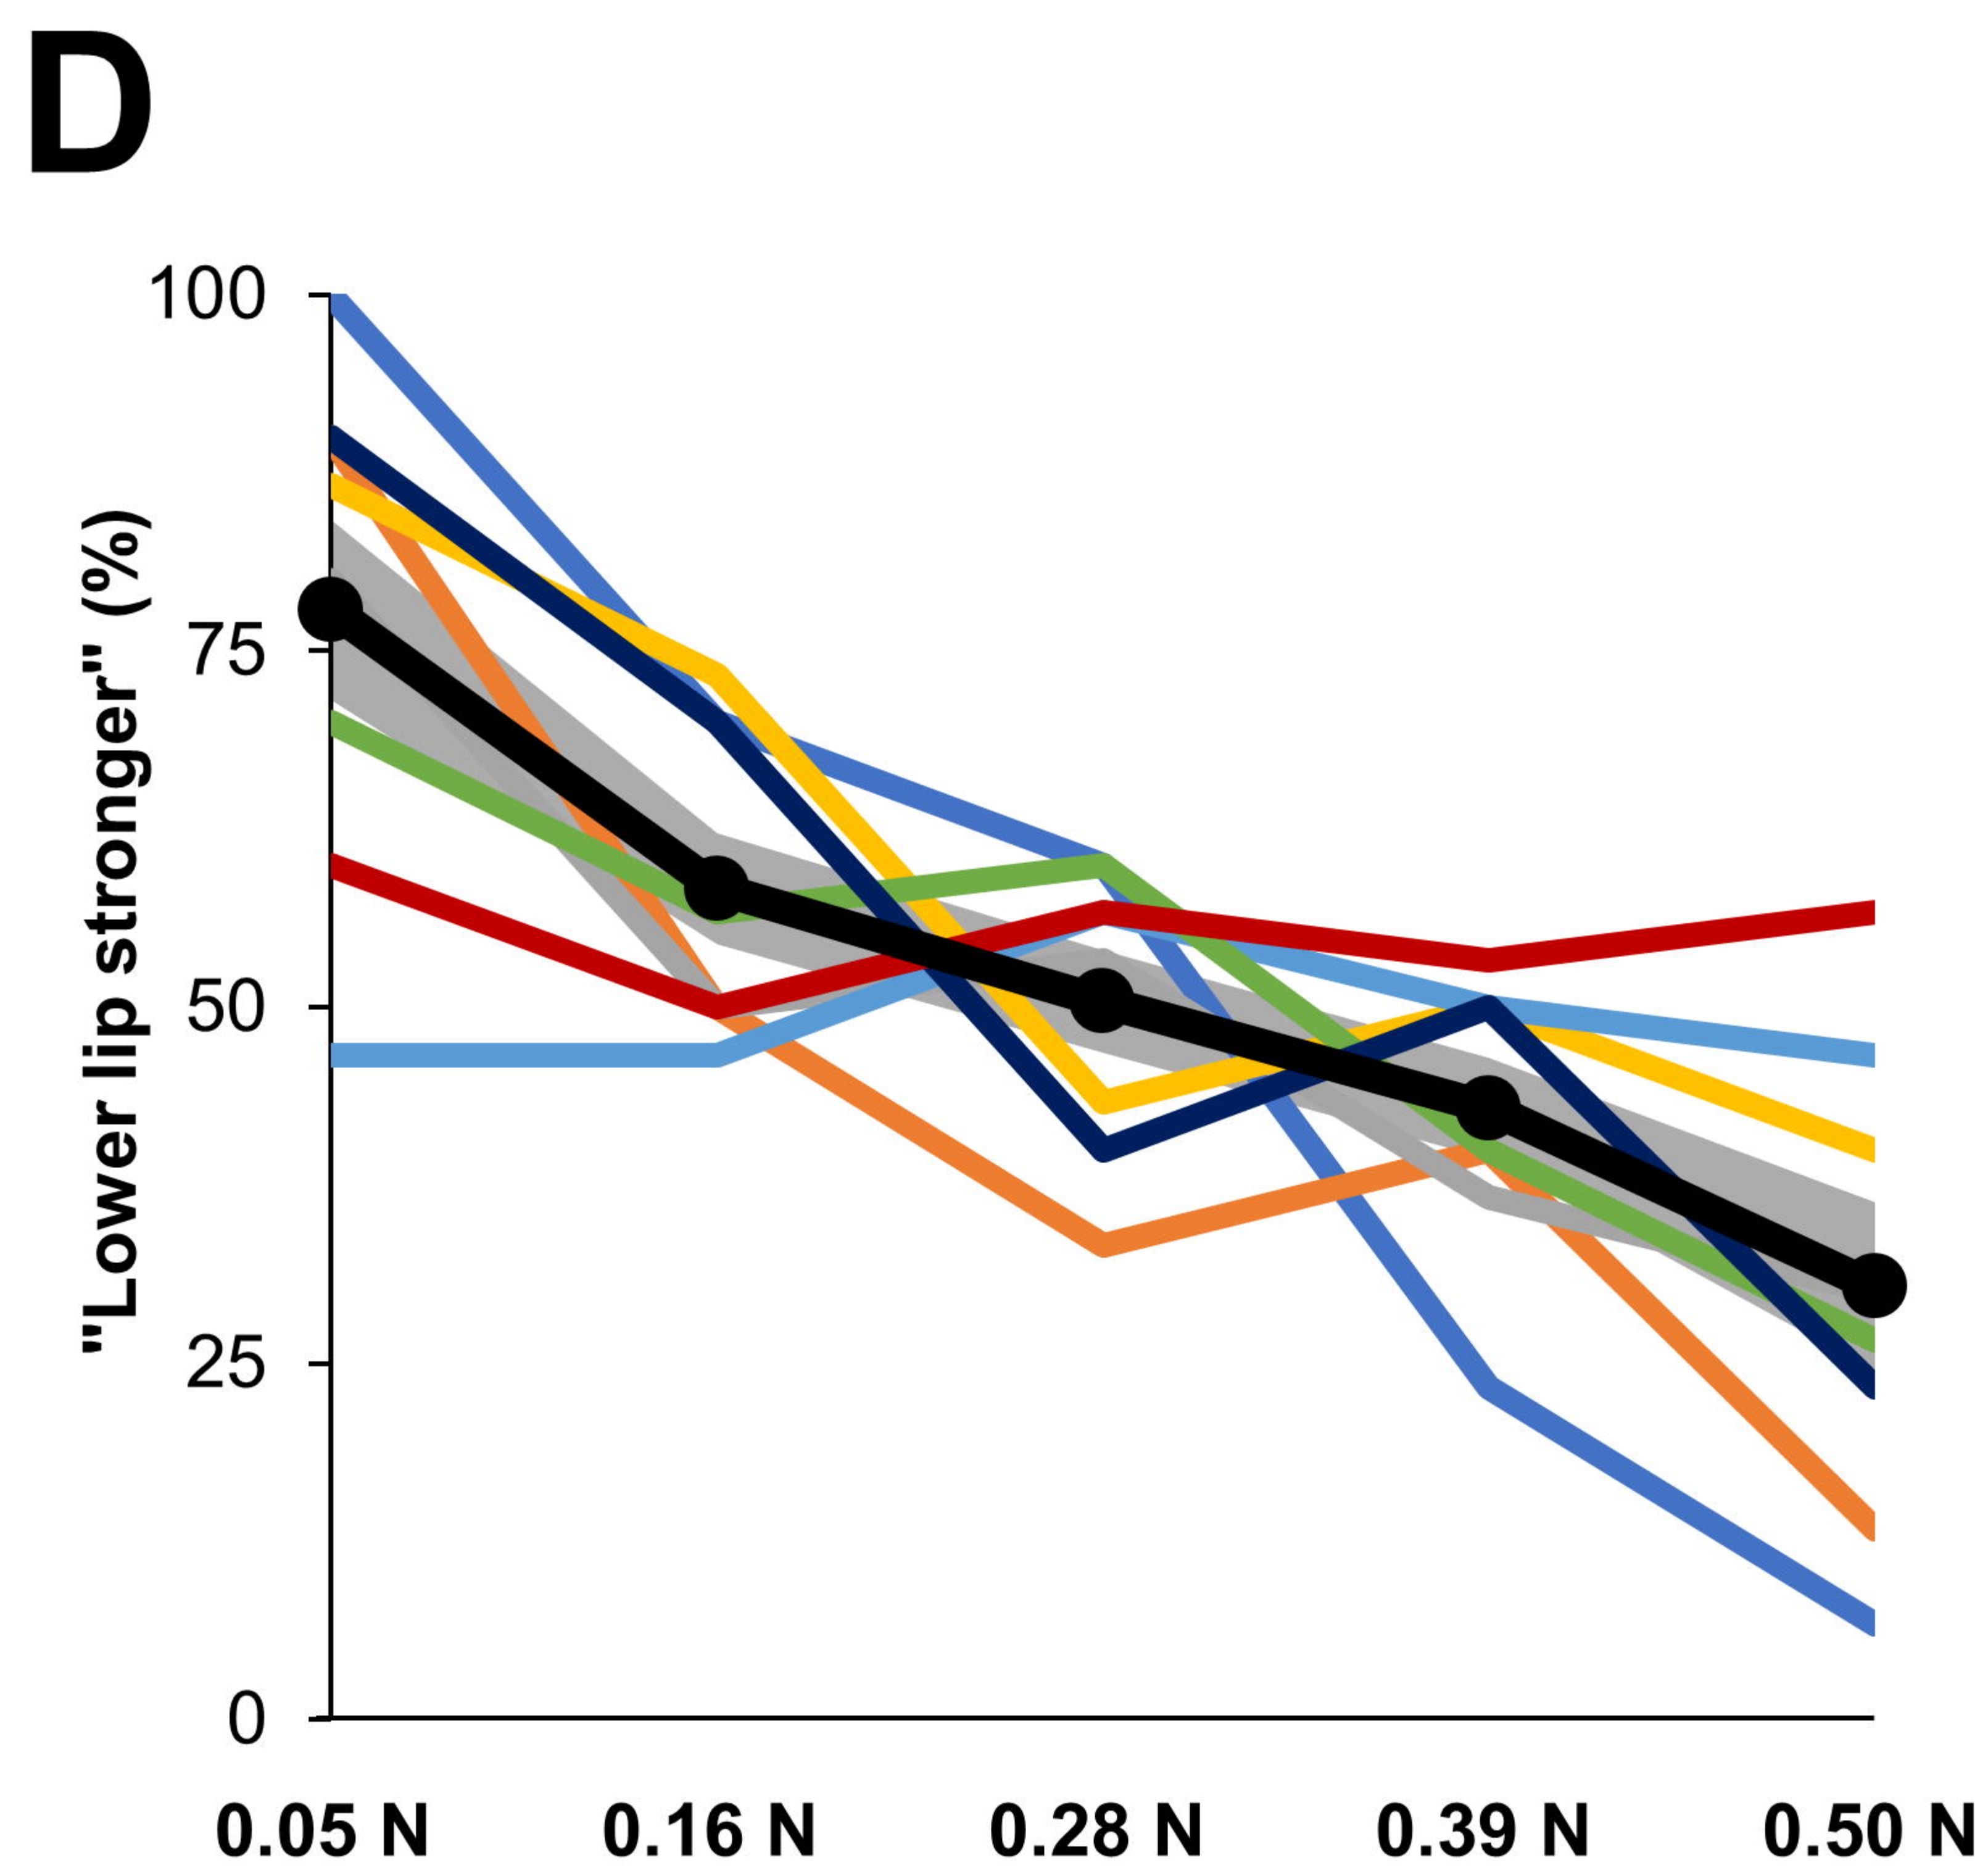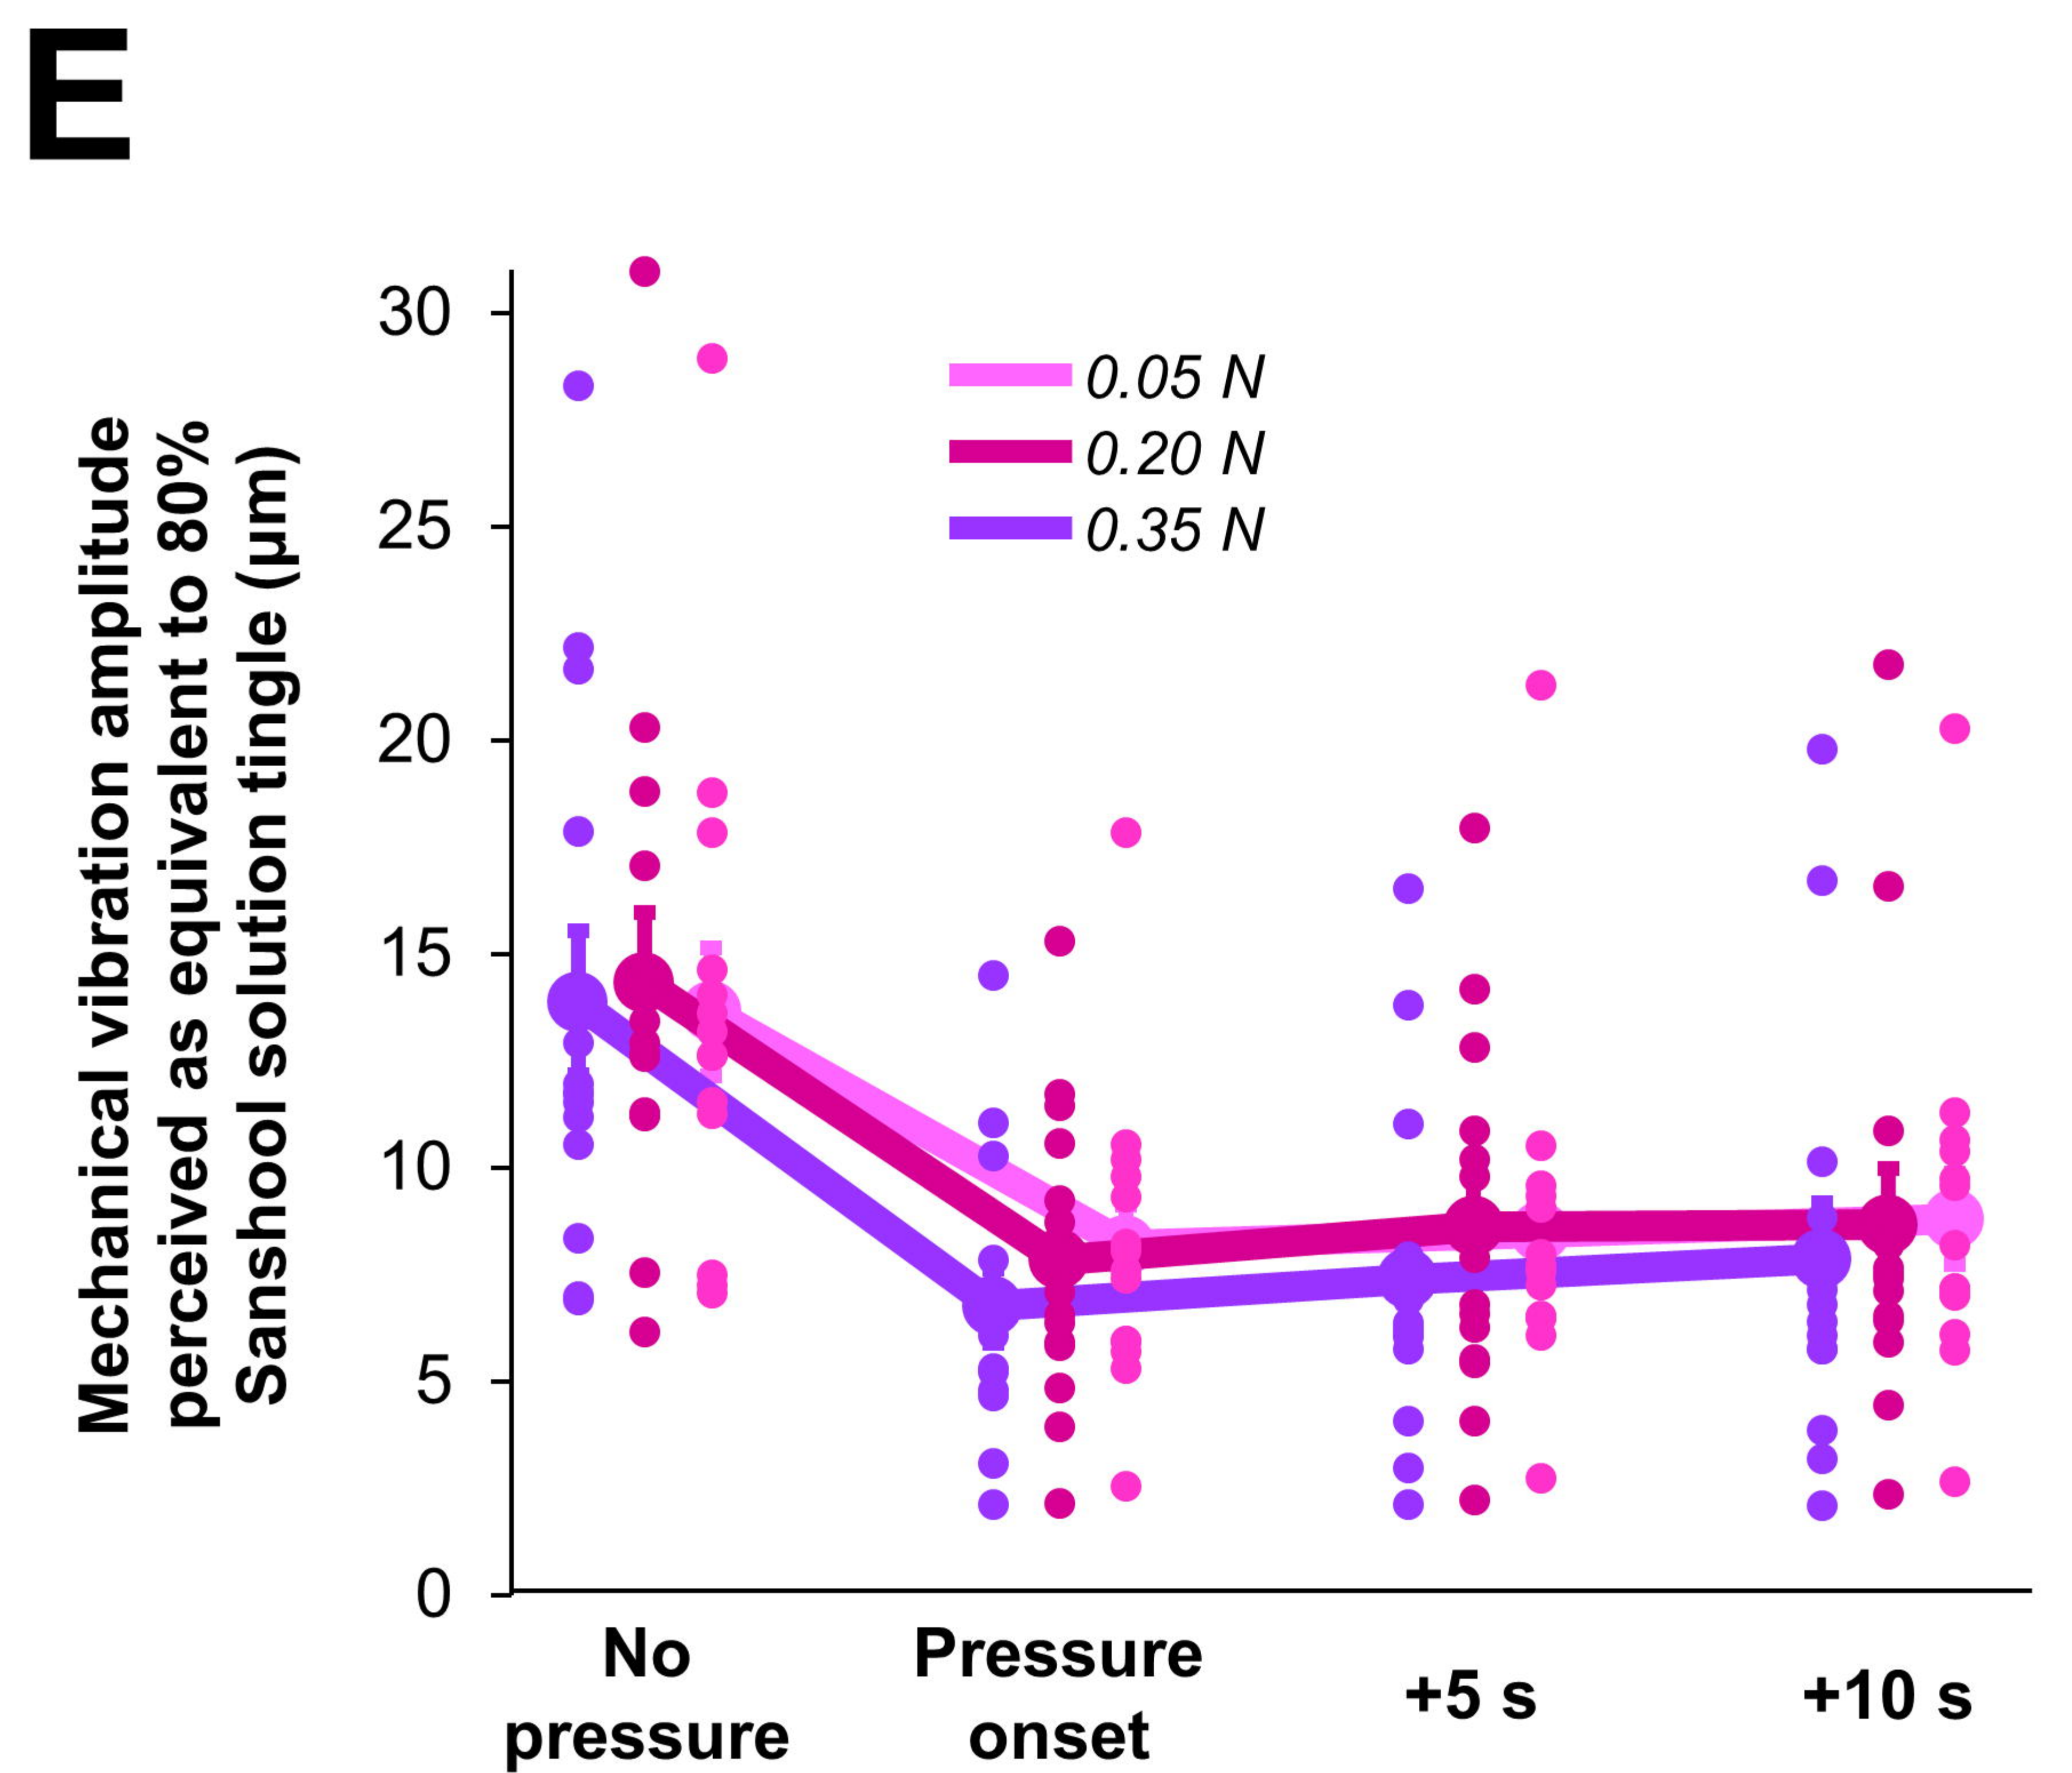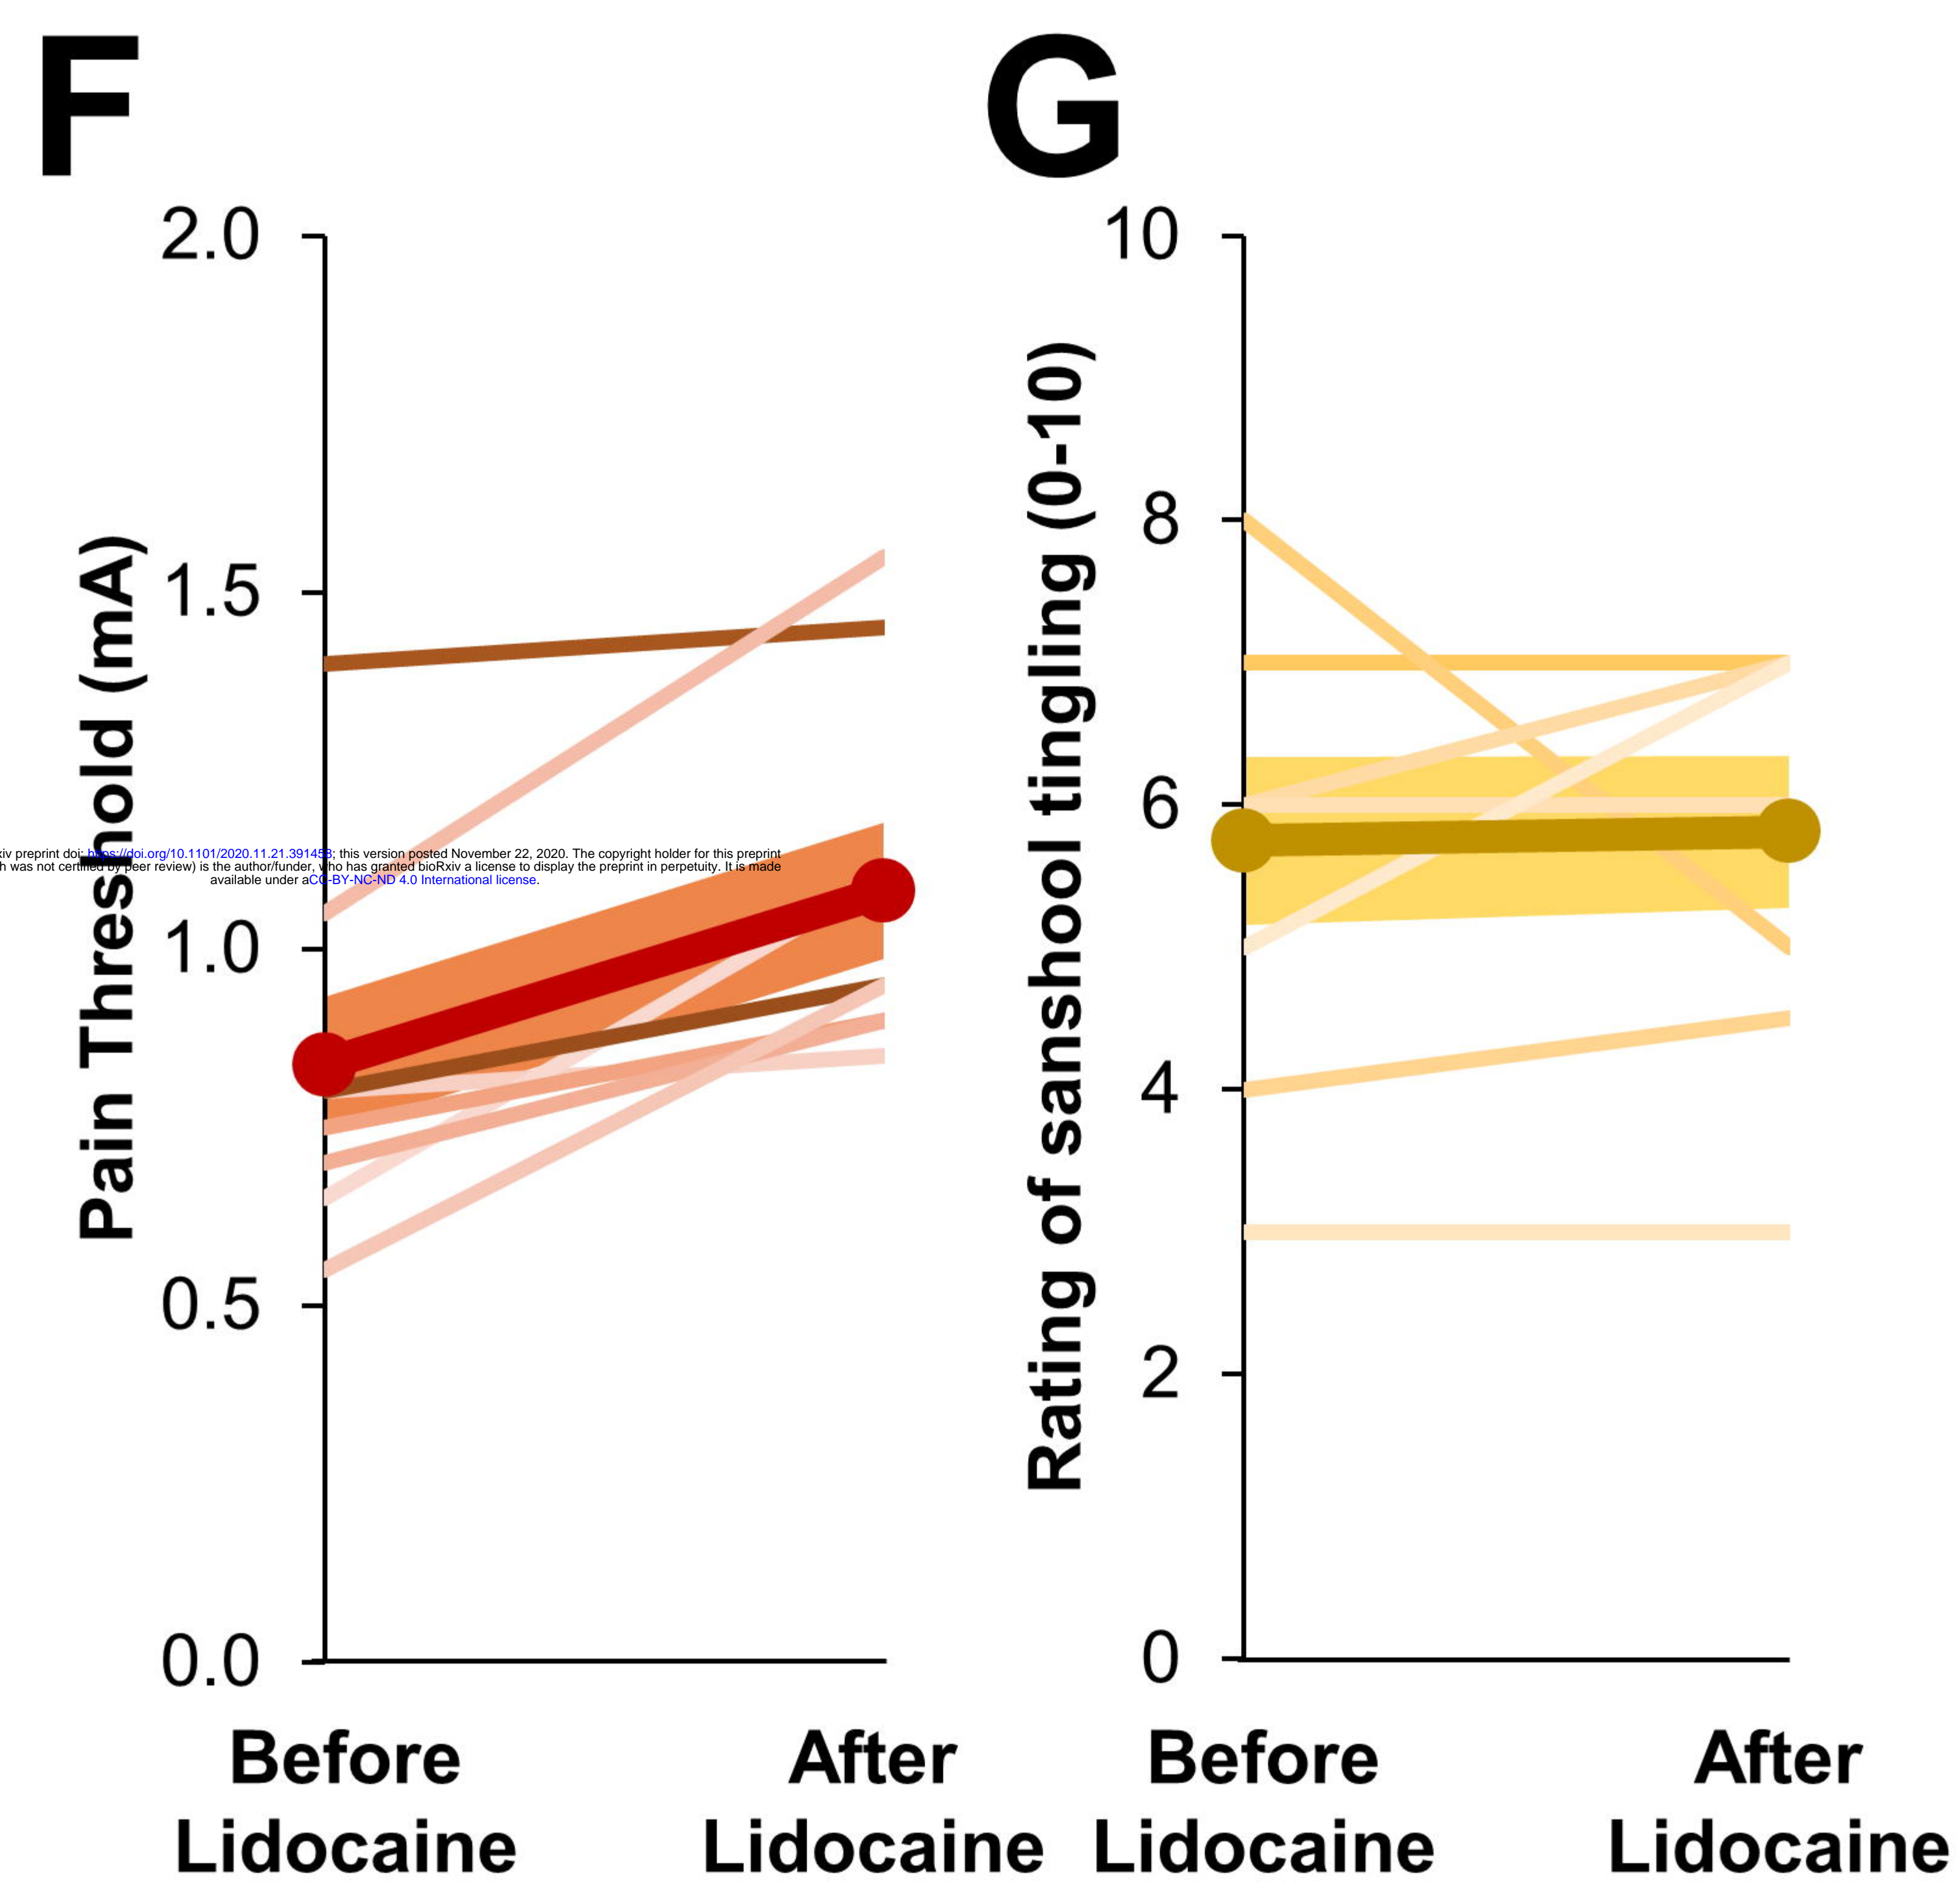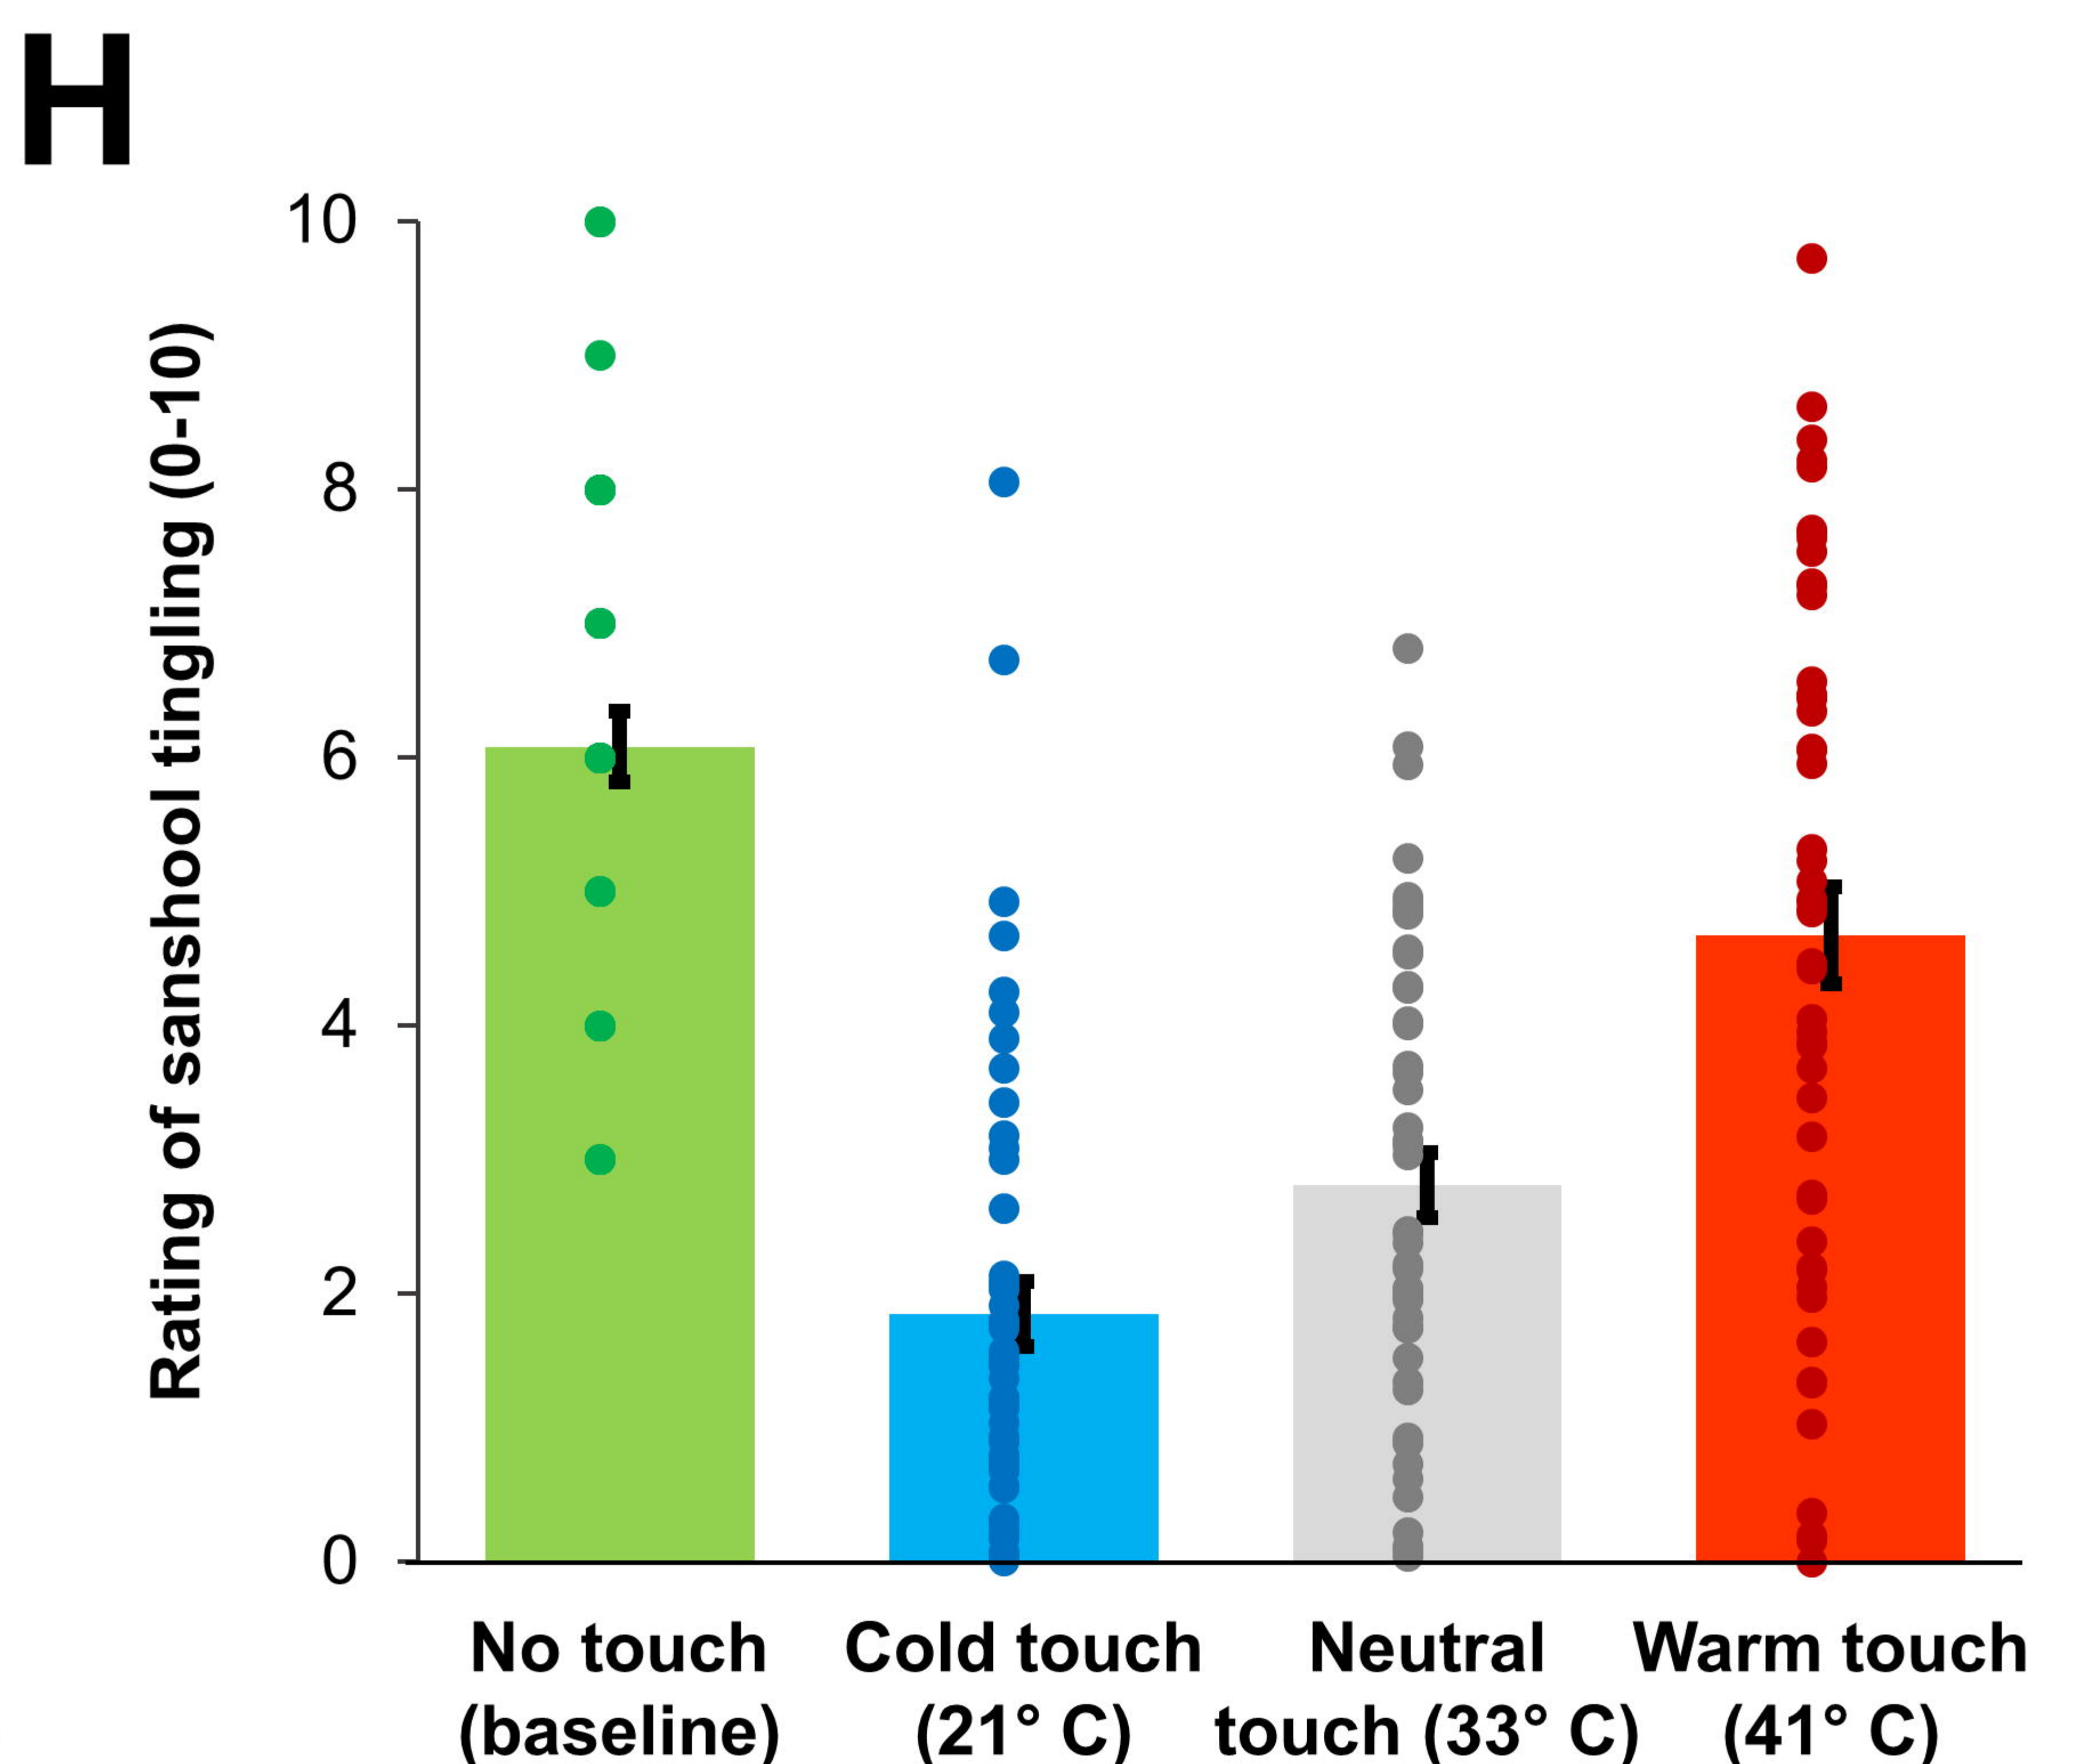



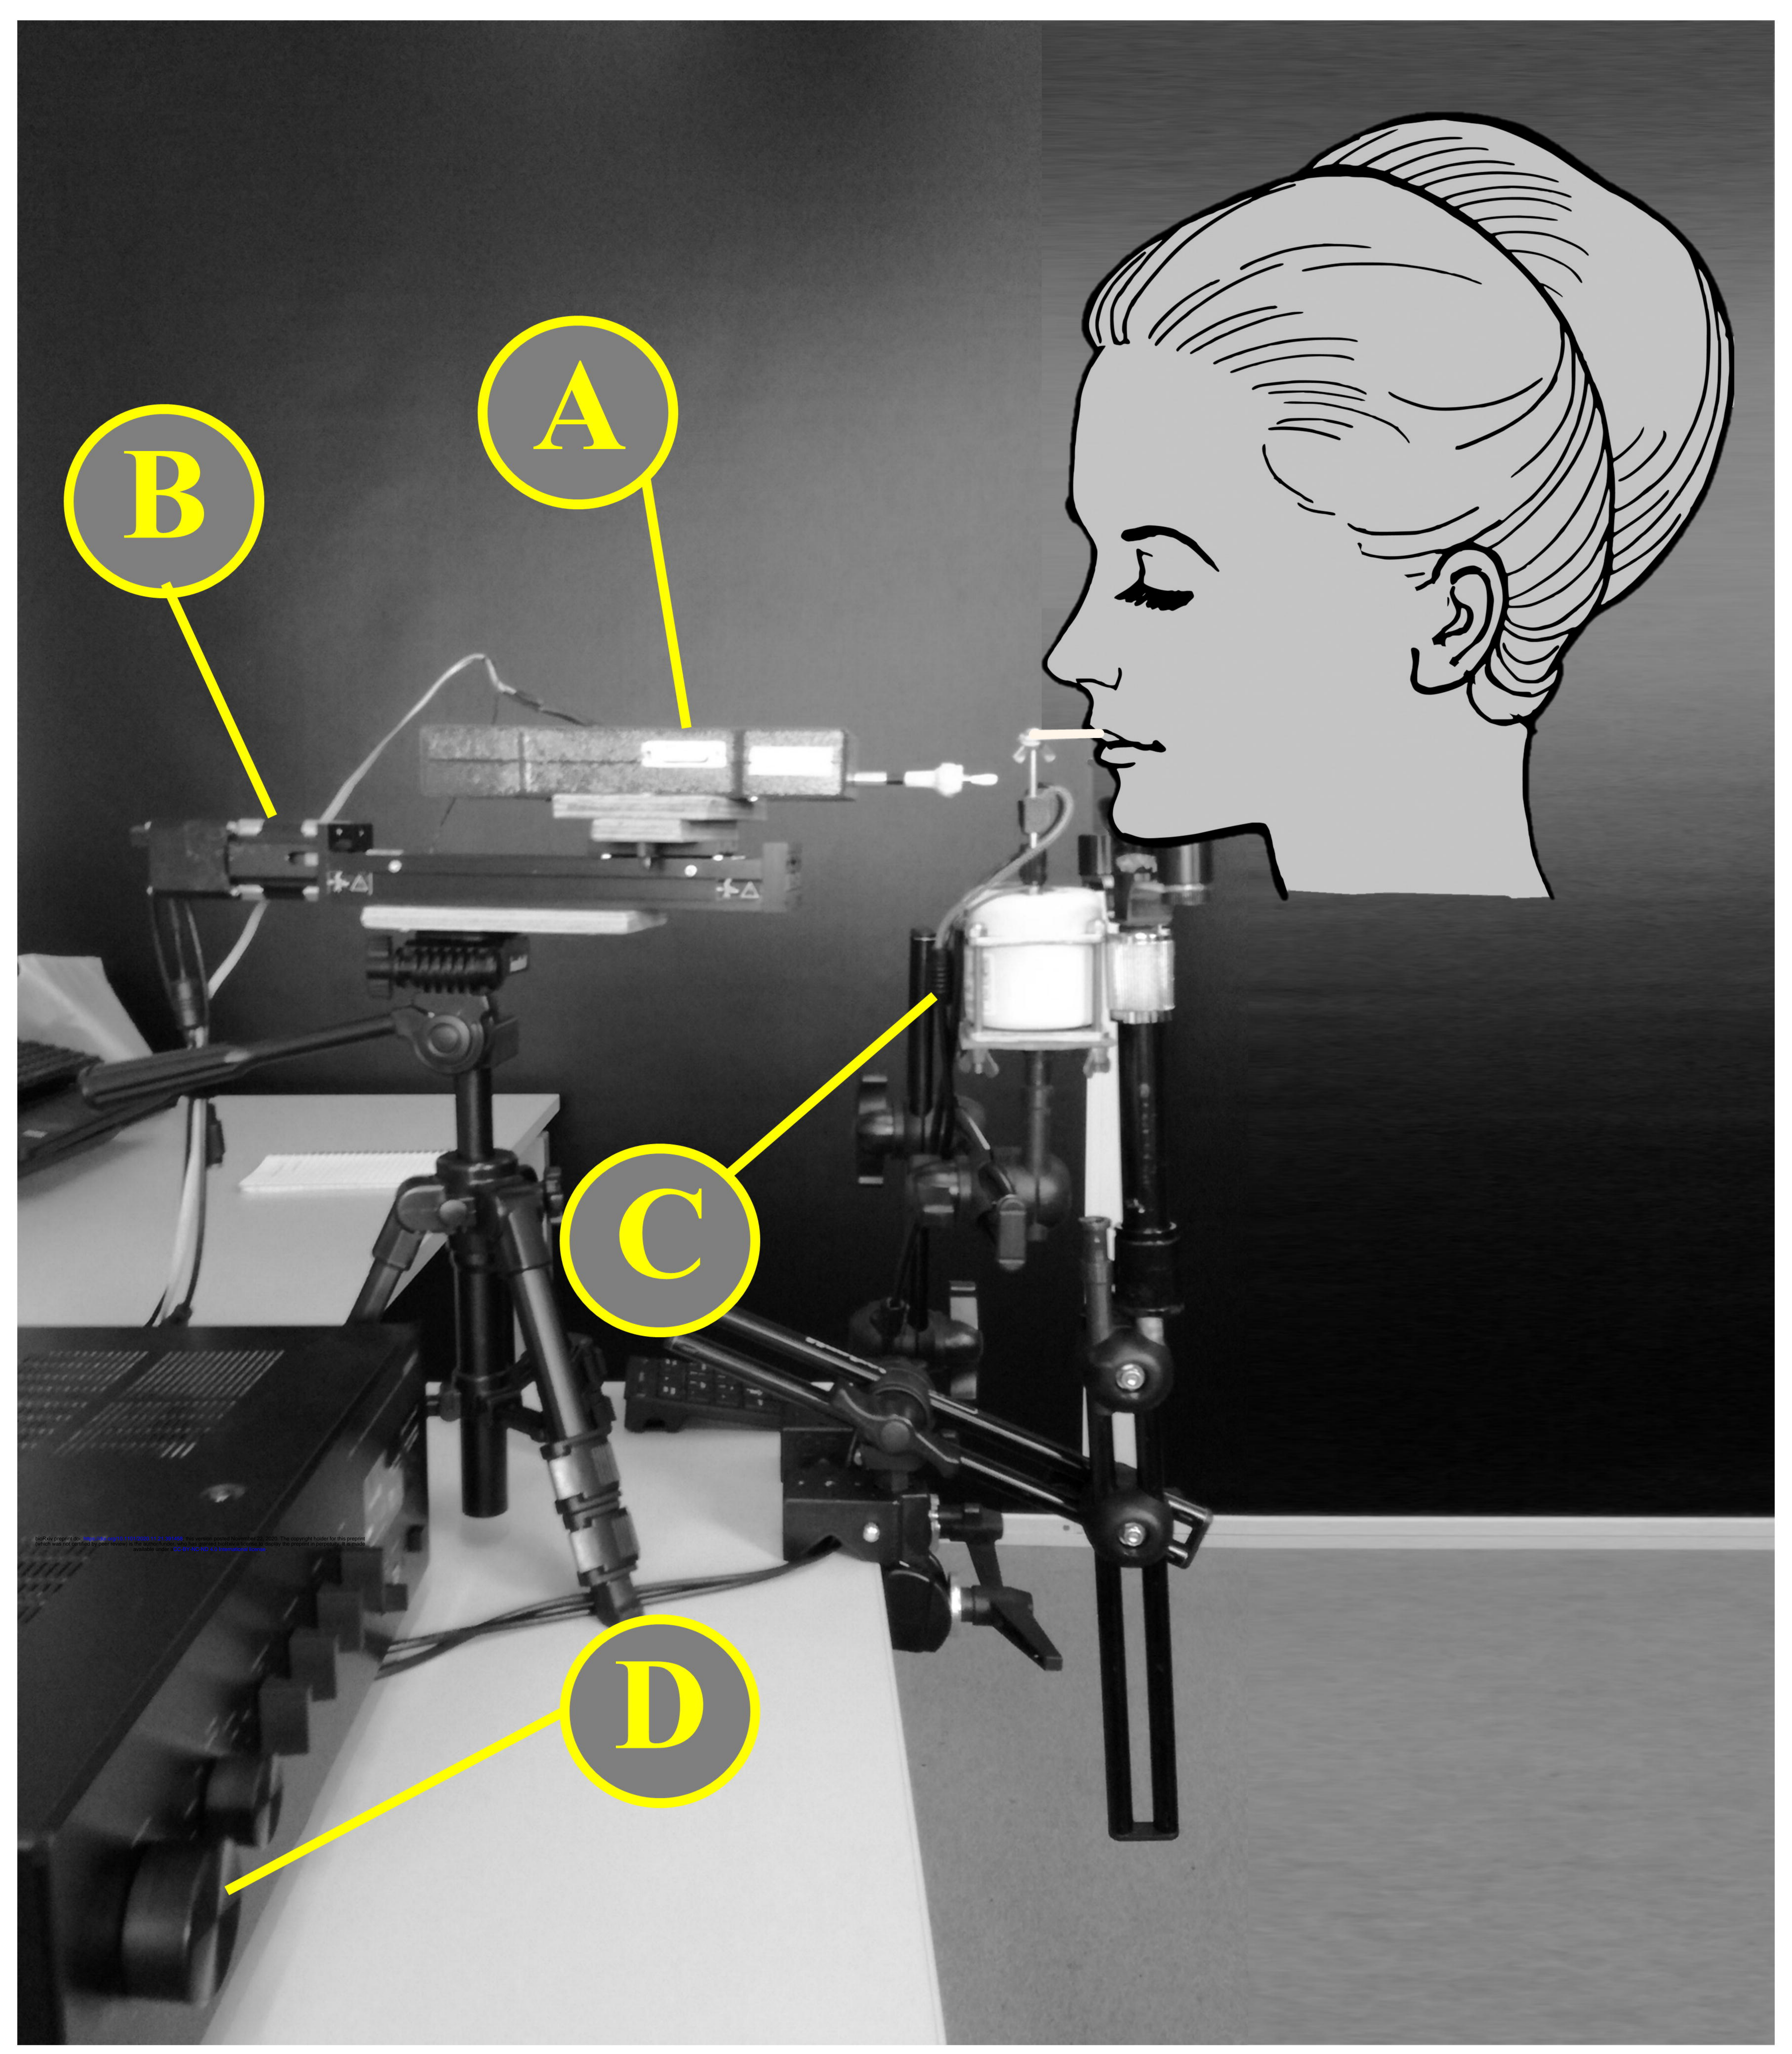

**B**

**A**

**C**

**D**

bioRxiv preprint doi: <https://doi.org/10.1101/2023.11.21.561998>; this version posted November 21, 2023. The copyright holder for this preprint (which was not certified by peer review) is the author/funder, who has granted bioRxiv a license to display the preprint in perpetuity. It is made available under aCC-BY-ND 4.0 International license.
